# Supplementary material for: Unravelling the Supramolecular Driving Forces in the Formation of CO2-Responsive Pseudopeptidic Low-Molecular-Weight Hydrogelators
Source: MDPI journal article supplement (doi:10.3390/gels8060390), 2022-06-20
Supplement: s1 [file s1]

# SUPPORTING INFORMATION

## Unravelling the supramolecular driving forces in the formation of CO<sub>2</sub>-responsive pseudopeptidic low molecular weight hydrogelators

Ferran Esteve<sup>1</sup>, Alexis Villanueva-Antolí<sup>2</sup>, Belen Altava<sup>1,\*</sup>, Eduardo García-Verdugo<sup>1</sup> and Santiago V. Luis<sup>1,\*</sup>

<sup>1</sup> Departamento de Química Inorgánica y Orgánica, Universitat Jaume I, Av. Sos Baynat s/n, 12071, Castellón, Spain

<sup>2</sup> Institute of Advanced Materials (INAM), Universitat Jaume I, 12071 Castelló de la Plana, Castellón, Spain

Corresponding Authors: \* E-mail: altava@uji.es \* E-mail: luiss@uji.es.

### Table of contents

|                                                                                                                                   |    |
|-----------------------------------------------------------------------------------------------------------------------------------|----|
| Table S1. CGC results by vial inversion.....                                                                                      | S1 |
| Figure S1. Vial inversion images for determining CGC.....                                                                         | S1 |
| Table S2. Thermal stability results using vial inversion.....                                                                     | S2 |
| Figure S2. Rheological measurements for <b>6b</b> (5 mg/mL).....                                                                  | S2 |
| Figure S3. pH dependence vial inversion tests.....                                                                                | S3 |
| Figure S4. SEM images for [ <b>6b</b> ·2HCl] crystals.....                                                                        | S3 |
| Figure S5. Partial <sup>1</sup> H NMR spectra for <b>6b</b> titration with H <sub>2</sub> O.....                                  | S4 |
| Figure S6. Partial <sup>1</sup> H NMR spectra for <b>6b</b> and <b>6f</b> titrations with H <sub>2</sub> O.....                   | S4 |
| Figure S7. Partial <sup>1</sup> H NMR spectra (aromatic region) for <b>6b</b> and <b>6f</b> titrations with H <sub>2</sub> O..... | S5 |
| Figure S8. Variable temperature <sup>1</sup> H NMR spectra.....                                                                   | S5 |
| Figure S9. MMFFaq non-covalent forces <b>6b</b> -dimer.....                                                                       | S6 |
| Figure S10. Partial <sup>1</sup> H NMR spectra for CO <sub>2</sub> absorption with <b>6b</b> .....                                | S6 |
| Figure S11. Time evolution <sup>1</sup> H NMR spectra for CO <sub>2</sub> absorption with <b>6b</b> .....                         | S7 |
| Figure S12. Main approaches for carbamate formation with diamines.....                                                            | S7 |
| Figure S13. Molecular models for ammonium carbamate <b>6b</b> -CO <sub>2</sub> species.....                                       | S8 |

|                                     |    |
|-------------------------------------|----|
| Spectroscopic characterisation..... | S9 |
|-------------------------------------|----|

### Molecular modelling

|                         |     |
|-------------------------|-----|
| Computational data..... | S15 |
|-------------------------|-----|

**Table S1.** Gelation properties for compound **6b** in DMSO:H<sub>2</sub>O (10:90) at different concentrations.<sup>a</sup>

| Entry | w/v (mg/mL) | mM   | Result <sup>a</sup> |
|-------|-------------|------|---------------------|
| 1     | 1.00        | 1.55 | G                   |
| 2     | 0.80        | 1.23 | wG                  |
| 3     | 0.60        | 0.91 | wG                  |
| 4     | 0.30        | 0.48 | S                   |
| 5     | 0.15        | 0.24 | S                   |
| 6     | 0.05        | 0.07 | S                   |

<sup>a</sup> Vial inversion method used for qualitative analyses. S: Soluble, wG: Weak Gel, G: Gel.

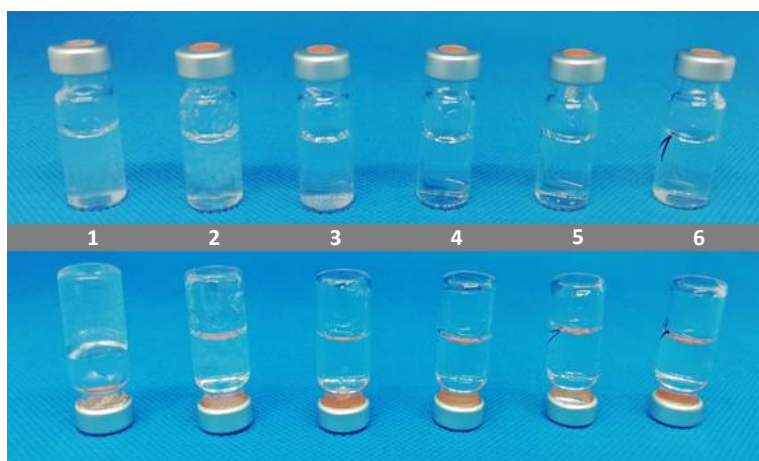

**Figure S1.** Vial inversion test pictures for determining the CGC of **6b** in H<sub>2</sub>O:DMSO (90:10). The white numbers correspond to their assigned entry in Table 2.

**Table S2.** Thermal stability results for the hydrogel of **6b** (1 mg/mL in H<sub>2</sub>O:DMSO 90:10).<sup>a</sup>

| Temperature (°C) | Result |
|------------------|--------|
| 25               | G      |
| 30               | G      |
| 35               | G      |
| 40               | G      |
| 45               | G      |
| 50               | G      |
| 55               | G      |
| 60               | G      |
| 65               | G      |
| 70               | G      |
| 75               | G      |
| 80               | G      |
| 85               | G      |
| 90               | wG     |

<sup>a</sup> The gel formation was qualitatively analysed by the vial inversion technique. I: Insoluble, S: Soluble, wG: Weak Gel, G: Gel. The sample was heated using an oil bath on a heating mantle.

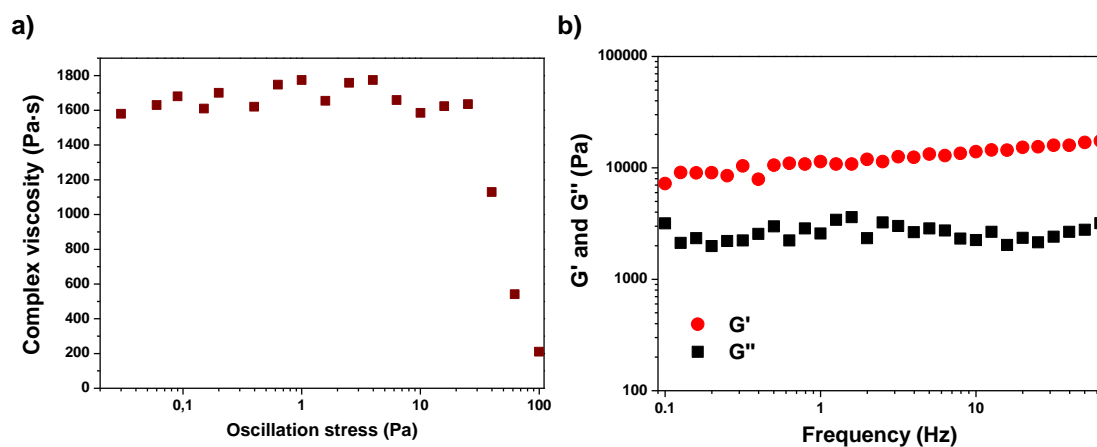

**Figure S2.** Rheological measurements (amplitude sweeps) for the hydrogel from **6b** (5 mg/mL, H<sub>2</sub>O:DMSO (90:10 v/v)). (a) The complex viscosity has been represented *vs* the oscillation stress. The frequency was set to 1 Hz. (b) Frequency sweeps with 0.1 Pa strain at 25 °C.

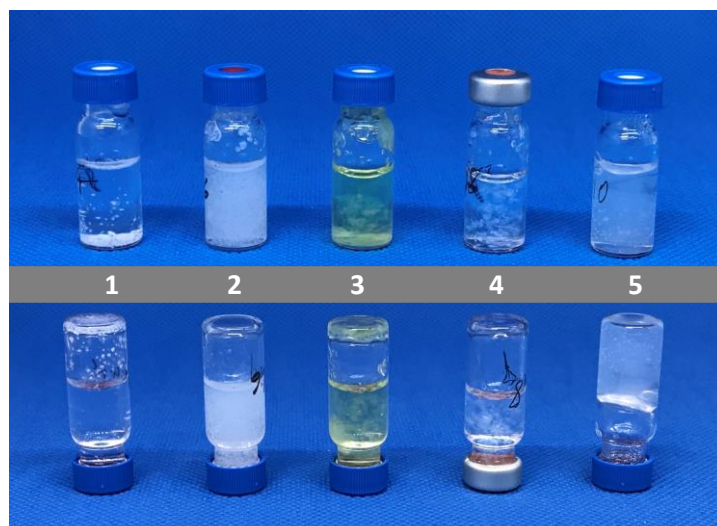

**Figure S3.** Effect of the pH in the gel formation for **6b** (1 mg/mL, buffer H<sub>2</sub>O:DMSO 90:10). Vial pictures at pH: 1 (vial 1), 6 (vial 2), 7 (vial 3), 4 (vial 4), and 8 (vial 5). The vial at pH = 7 has a yellowish colour because the buffer used (Aldrich) presented a yellow colour for easy recognition.

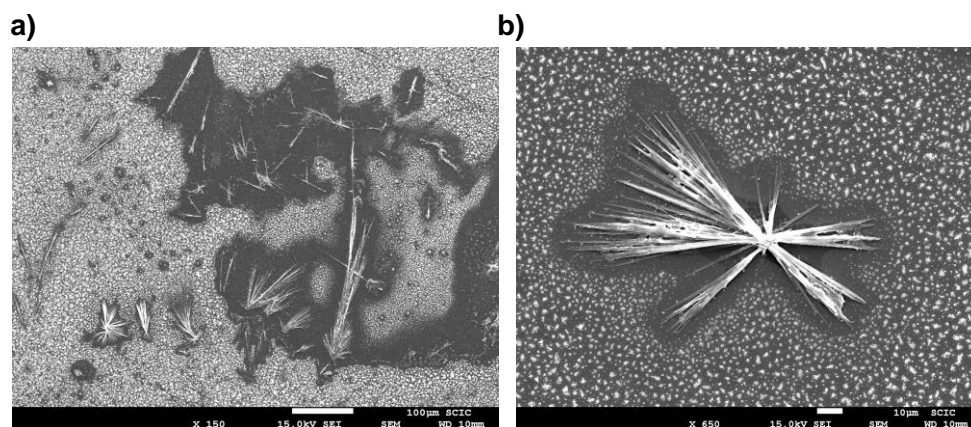

**Figure S4.** SEM images for the crystals obtained for a dried sample of **6b** (1 mg/mL) in DMSO:H<sub>2</sub>O (10:90) at pH = 1. The crystalline solid has been assigned to the diprotonated [**6b**·2HCl] species.

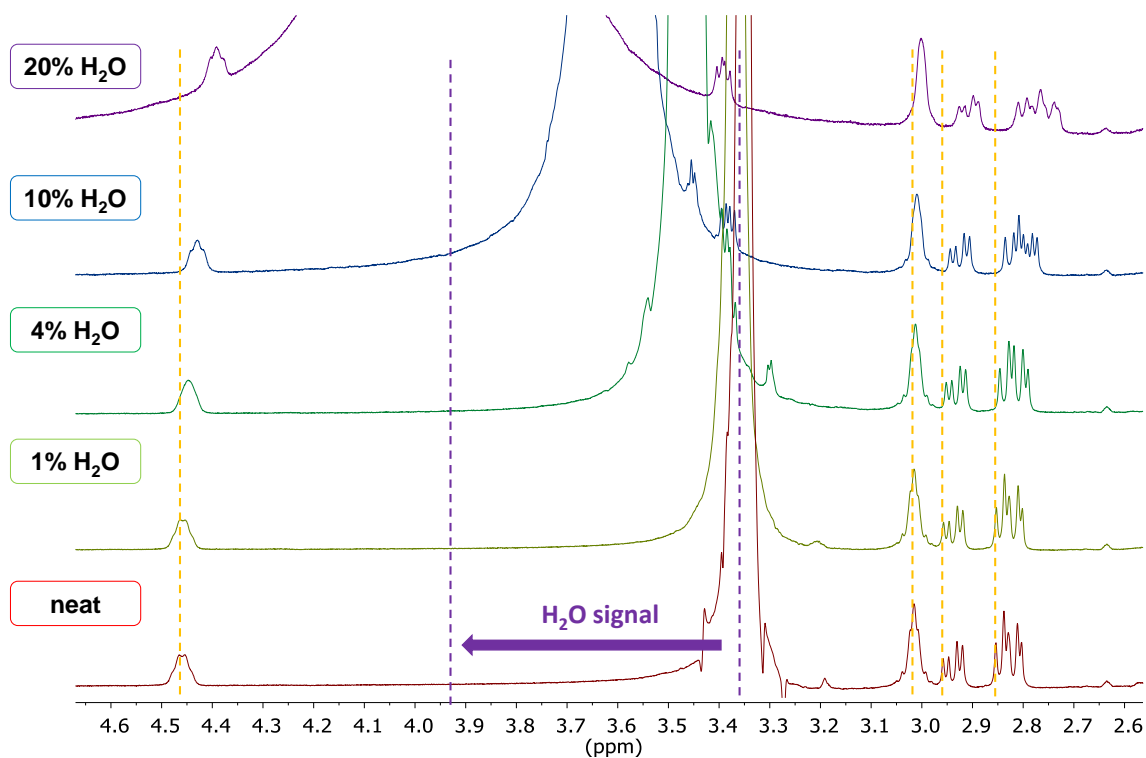

**Figure S5.** Partial  $^1\text{H}$  NMR (500 MHz,  $\text{DMSO}-d_6$ ) spectra for the titration of **6b** (3 mM) with increasing amounts of water. The water content has been indicated as v/v (%).

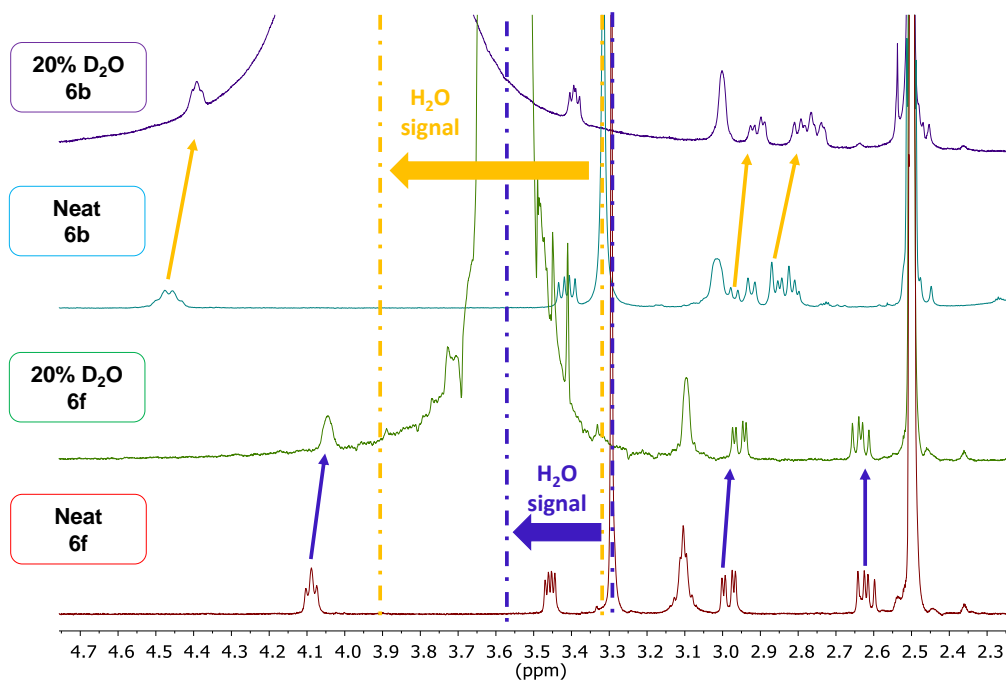

**Figure S6.** Partial  $^1\text{H}$  NMR (500 MHz,  $\text{DMSO}-d_6$ , 3 mM) spectra for **6b** (above) and **6f** (below) in the presence and absence of  $\text{H}_2\text{O}$ . The spectra display the 4.7 – 2.3 ppm region. The water content has been indicated as v/v (%). The most relevant shifts have been highlighted in blue and orange for **6f** and **6b**, respectively.

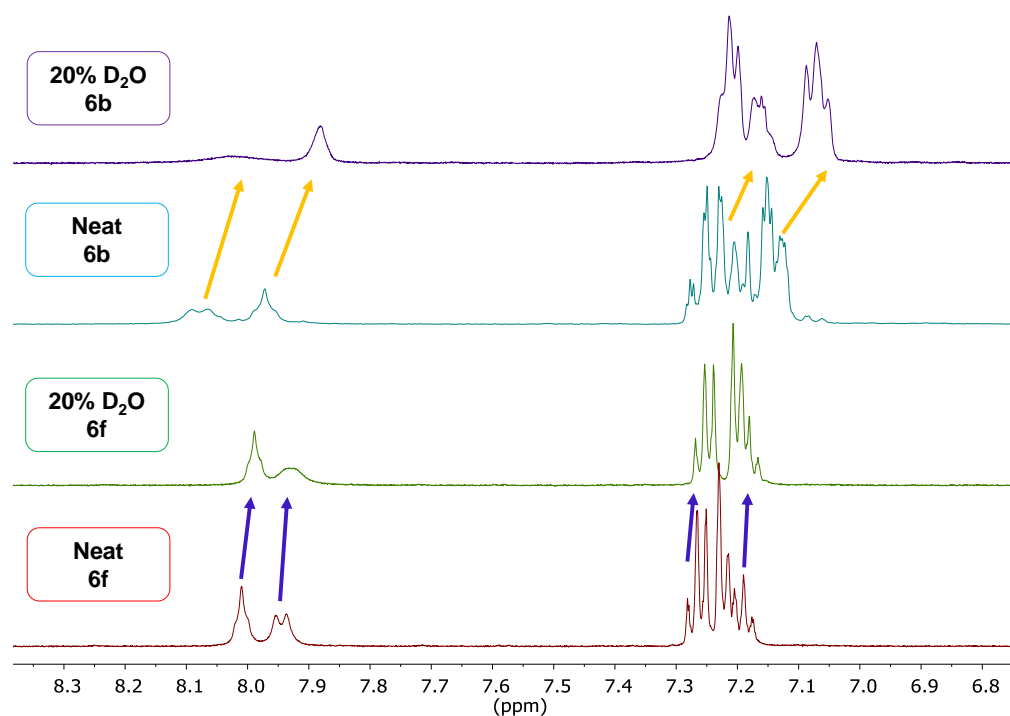

**Figure S7.** Partial <sup>1</sup>H NMR (500 MHz, DMSO-*d*<sub>6</sub>, 3 mM) spectra for **6b** (above) and **6f** (below) in the presence and absence of H<sub>2</sub>O. The spectra display the 8.3 – 6.8 ppm region. The water content has been indicated as v/v (%). The most relevant shifts have been highlighted in blue and orange for **6f** and **6b**, respectively.

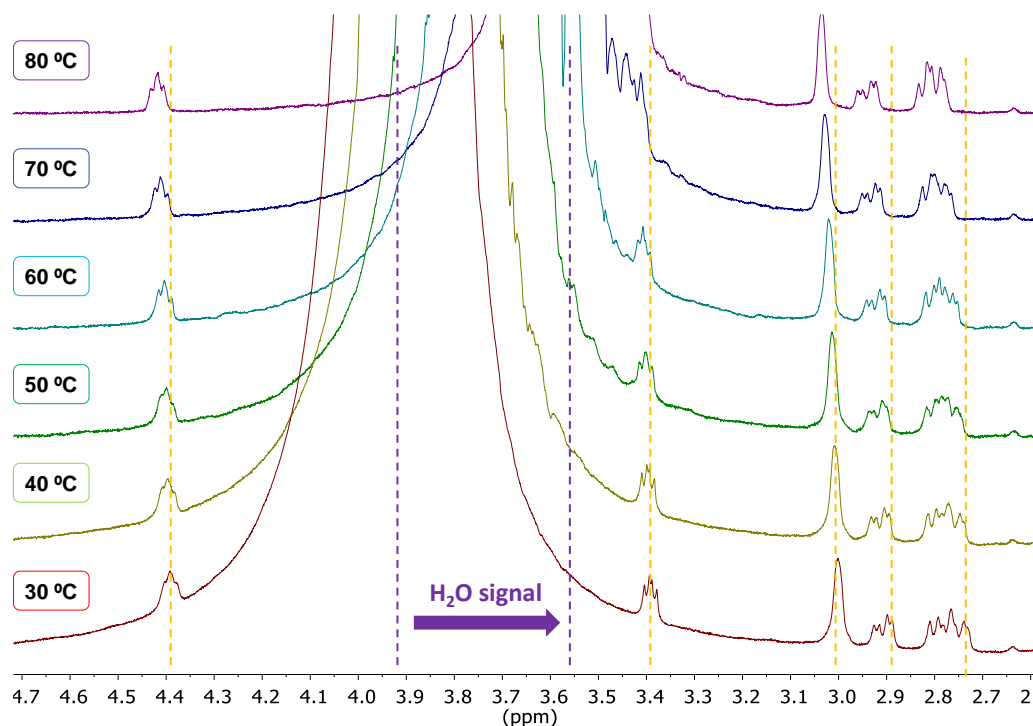

**Figure S8.** Partial <sup>1</sup>H NMR (500 MHz, DMSO-*d*<sub>6</sub>) spectra for the variable temperature experiments of **6b** (3 mM, H<sub>2</sub>O : DMSO, 20 : 80). The spectra display the 4.7 – 2.6 ppm region. Water shift has been highlighted in purple. Shifts for the characteristic protons of **6b** are highlighted in orange.

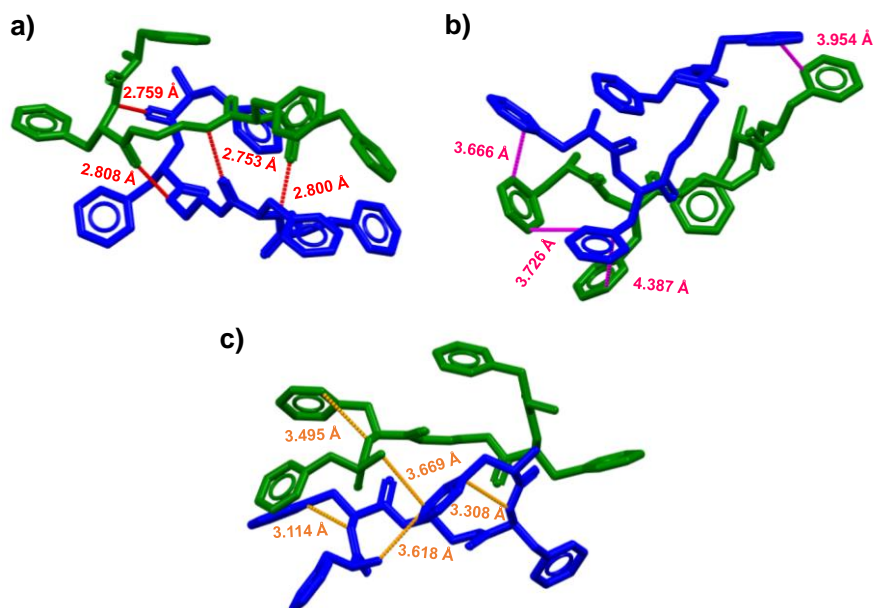

**Figure S9.** Non-covalent forces identified in the most stable conformation obtained for the dimer of **6b** (Spartan08', MMFFaq). (a) Intermolecular hydrogen bonding between the amide groups of the two different molecules. Bonds and distances have been highlighted in red. Measured distances correspond to O...N bonds in the C=O...N-H entities. (b) Intermolecular edge-to-face  $\pi$ - $\pi$  interactions between the dimeric molecules. Bonds and distances have been highlighted in pink. Measured distances correspond to the closest aromatic carbons between the vicinal rings. (c) Intramolecular NH... $\pi$  interactions between the aromatic rings and the acidic NH protons of the amide groups. Bonds and distances have been highlighted in orange. Measured distances correspond to the closest aromatic carbon to the N atom of the amides.

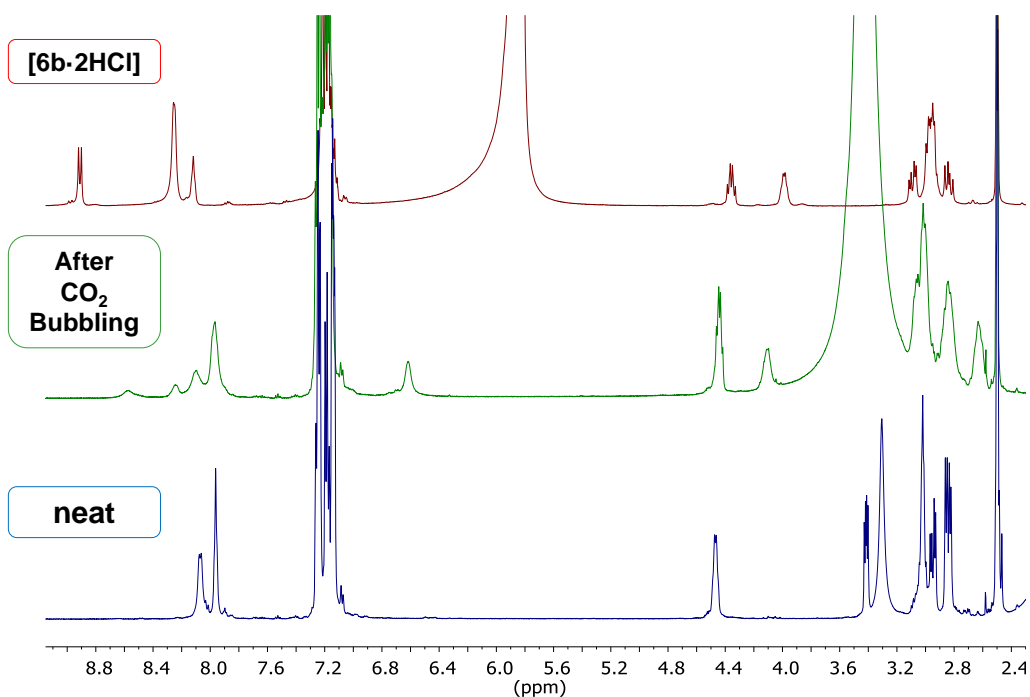

**Figure S10.** Partial  $^1\text{H}$  NMR (500 MHz, 35 mM in **6b**,  $\text{DMSO-}d_6$ ) spectra for neat **6b** (blue spectrum), **6b** sample after  $\text{CO}_2$  bubbling (green spectrum), and **[6b·2HCl]** (red spectrum).

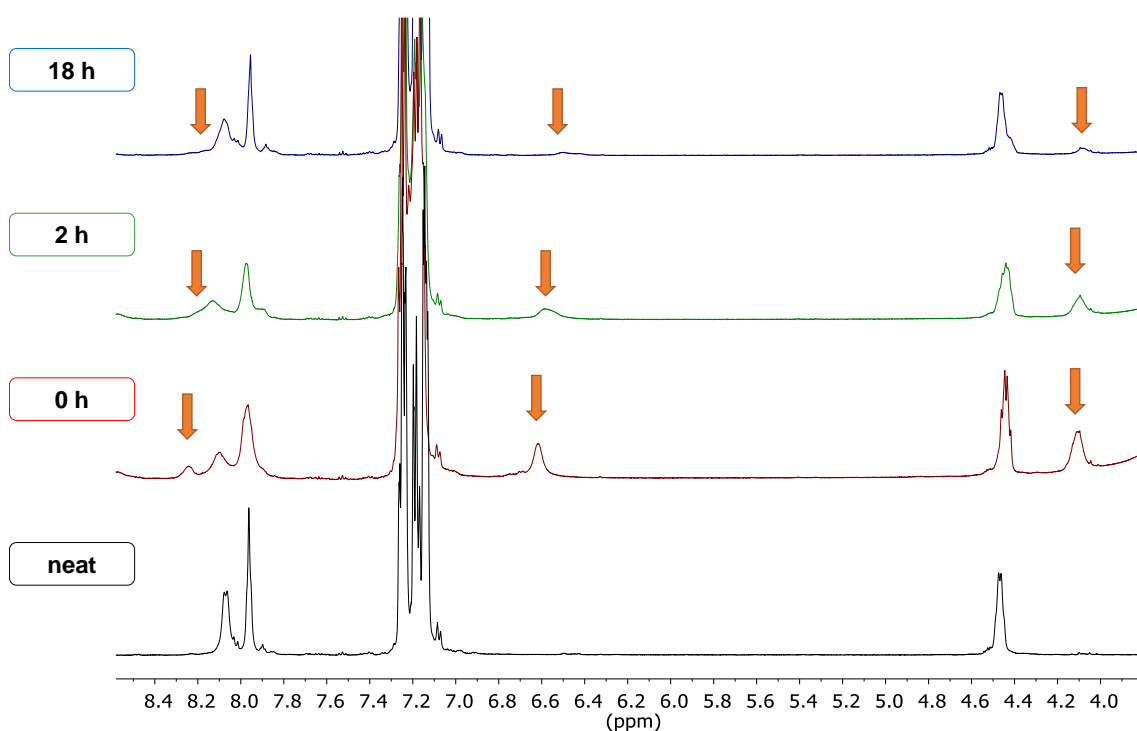

**Figure S11.** Time evolution of the partial  $^1\text{H}$  NMR (500 MHz, 35 mM in **6b**, 25  $^\circ\text{C}$ ,  $\text{DMSO-}d_6$ ) spectra for **6b** at different times after bubbling  $\text{CO}_2$ . The signals highlighted with orange arrows have been assigned to the metastable carbamate-derived species.

a) Intramolecular asymmetric carbamate

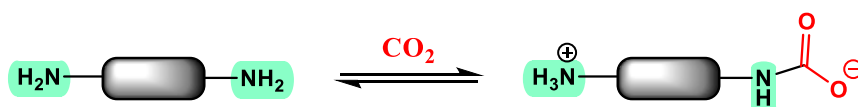

b) Dimeric symmetric carbamate

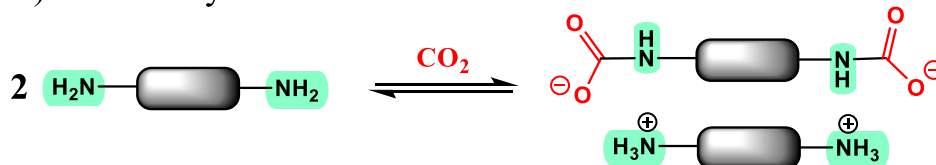

**Figure S12.** Main approaches described for the  $\text{CO}_2$  absorption using diamino compounds. (a) Intramolecular asymmetric ammonium carbamate formation. (b) dimeric symmetric ammonium carbamate formation.



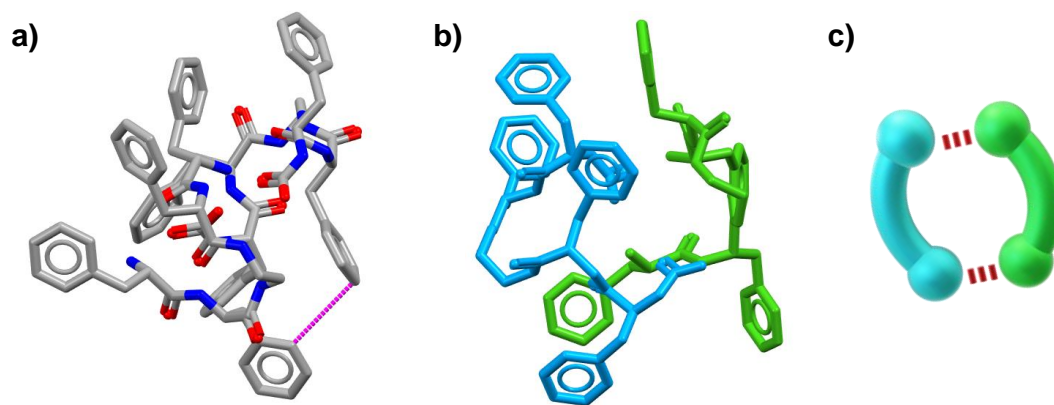

**Figure S13.** a) Most stable conformation obtained for the **6b**-CO<sub>2</sub> ammonium carbamate-derived symmetric dimer (Spartan08', MMFFaq). The presence of only one  $\pi$ - $\pi$  interaction has been highlighted with a discontinuous magenta line. b) Most stable conformation obtained for the **6b**-CO<sub>2</sub> ammonium carbamate-derived symmetric dimer, with each one pseudopeptidic molecule coloured in green and the other one in light blue (Spartan08', MMFFaq). c) Representation of the supramolecular macrocyclic conformation adopted by the dimeric ammonium carbamate derivative. Electrostatic interactions have been highlighted with discontinuous red lines.

## SPECTROSCOPIC CHARACTERISATION

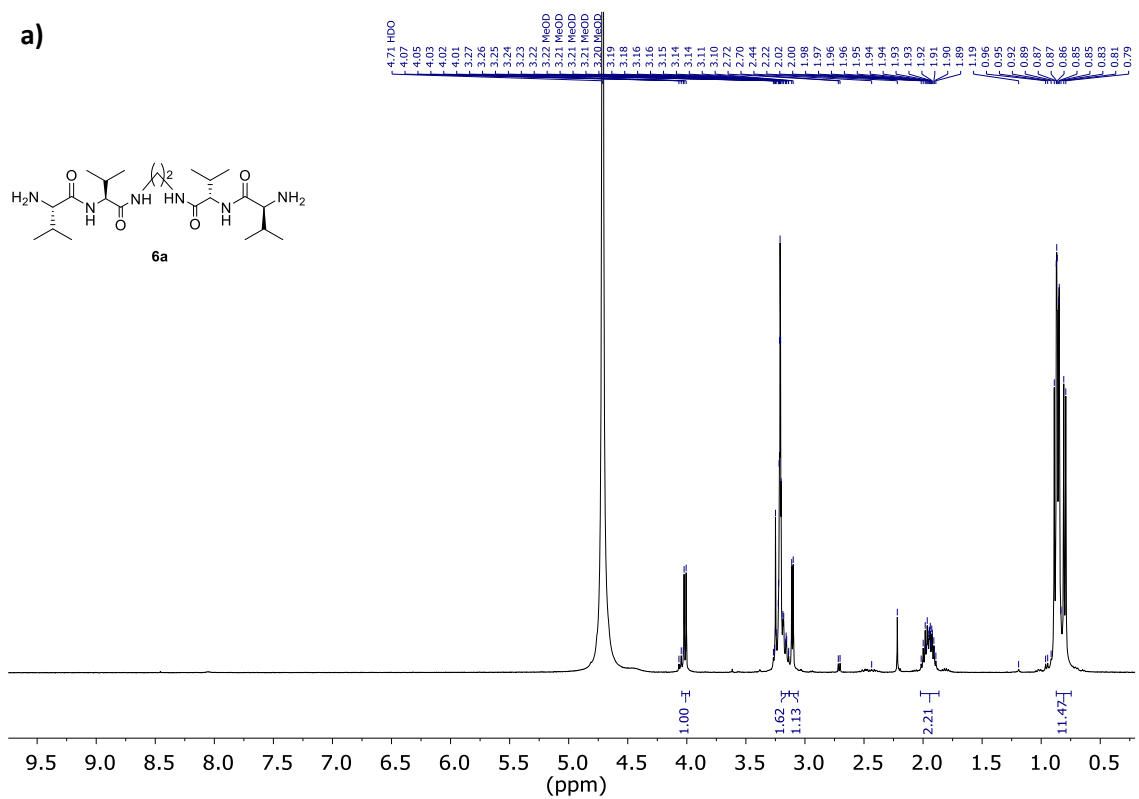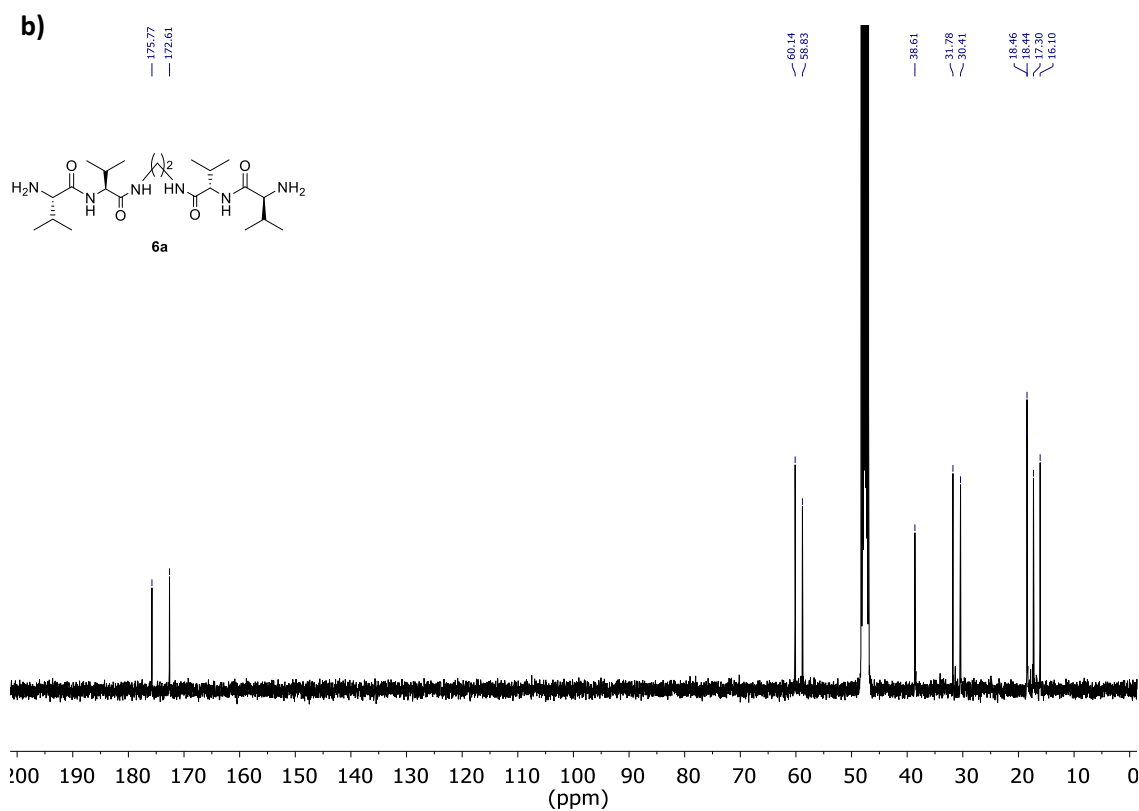

**Figure S14.** a) <sup>1</sup>H NMR (400 MHz, CD<sub>3</sub>OD) for **6a** (7 mM). b) <sup>13</sup>C{<sup>1</sup>H} NMR (75 MHz, CD<sub>3</sub>OD) for **6a** (10 mM).

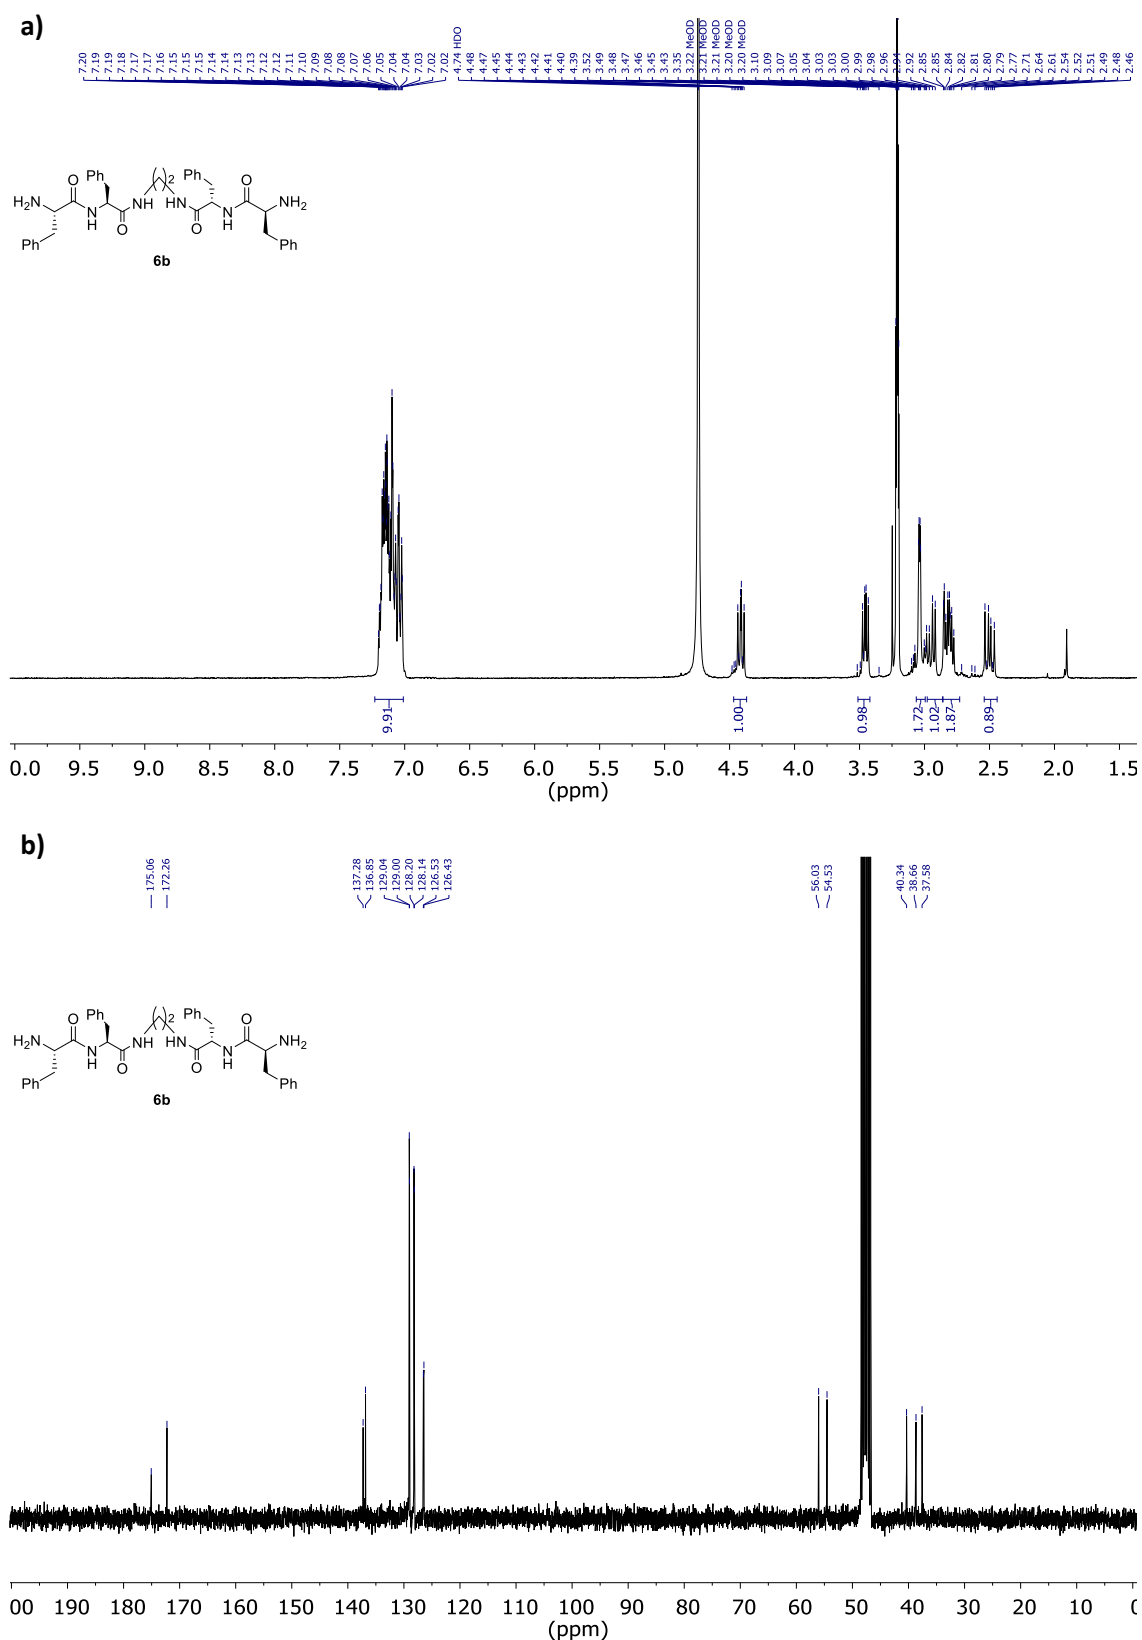

**Figure S15.** a)  $^1\text{H}$  NMR (300 MHz,  $\text{CD}_3\text{OD}$ ) for **6b** (7 mM). b)  $^{13}\text{C}\{^1\text{H}\}$  NMR (75 MHz,  $\text{CD}_3\text{OD}$ ) for **6b** (7 mM).

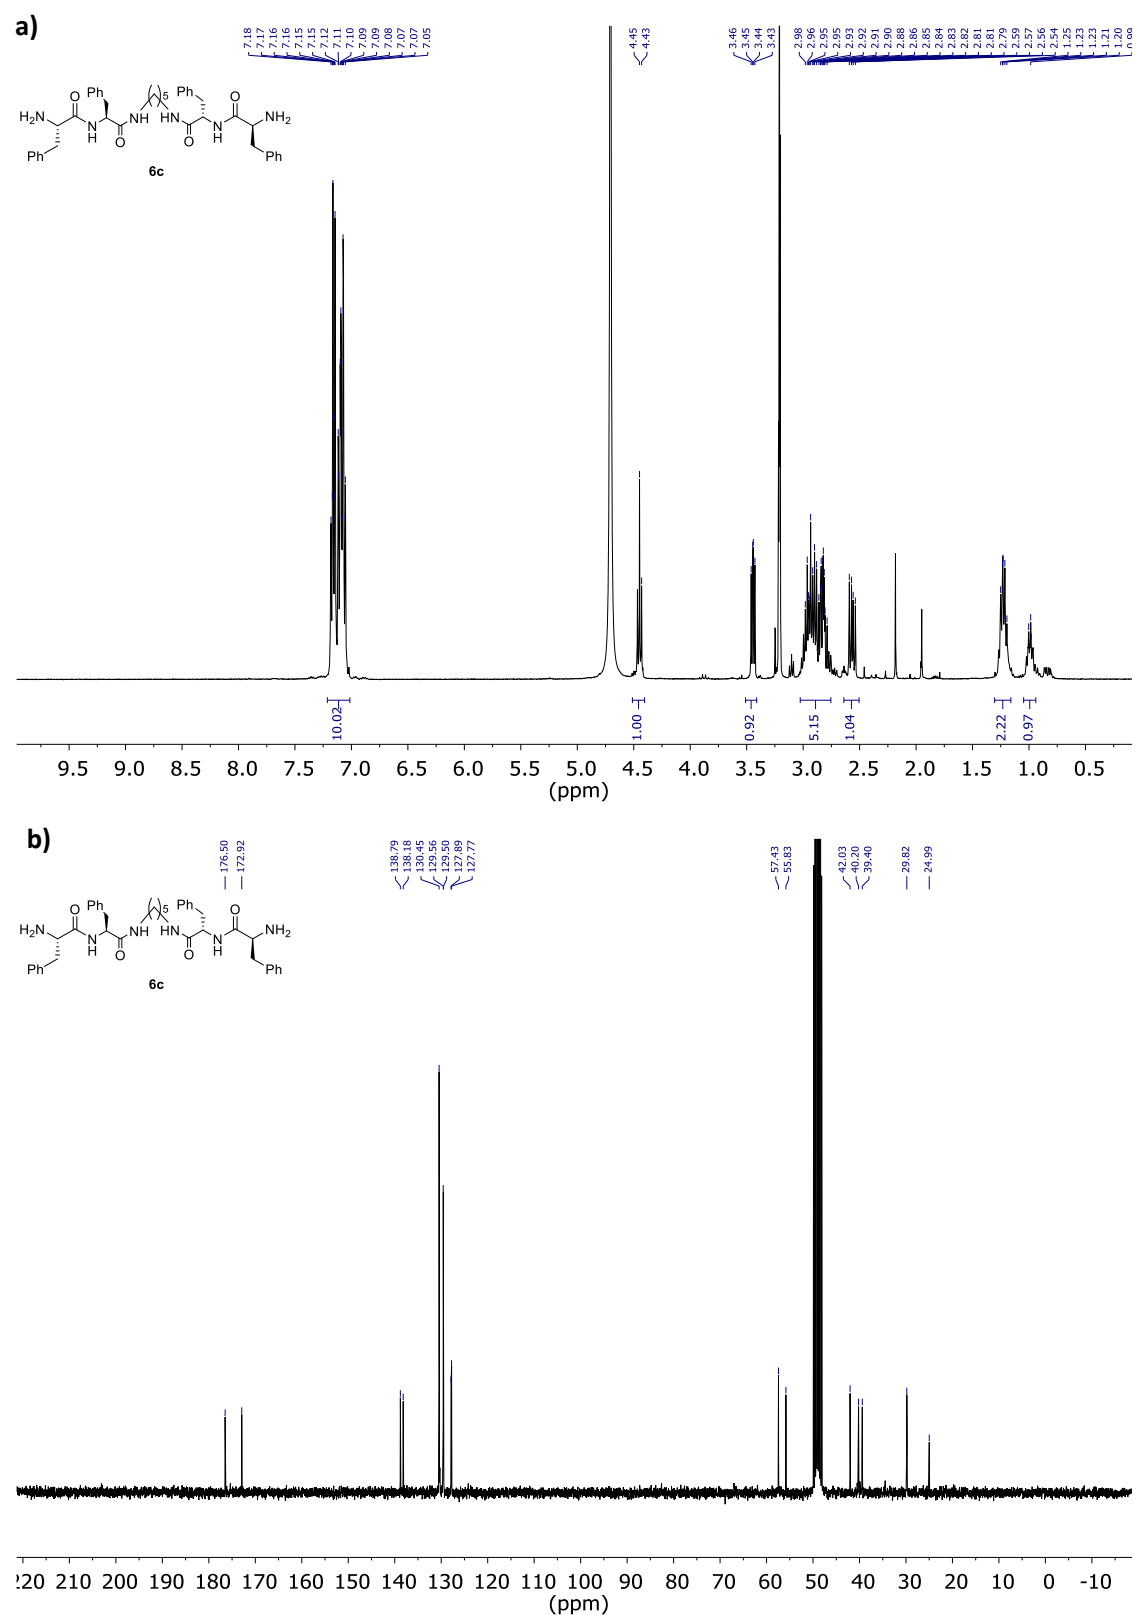

**Figure S16.** a)  $^1\text{H}$  NMR (400 MHz,  $\text{CD}_3\text{OD}$ ) for **6c** (10 mM). b)  $^{13}\text{C}\{^1\text{H}\}$  NMR (100 MHz,  $\text{CD}_3\text{OD}$ ) for **6c** (10 mM).

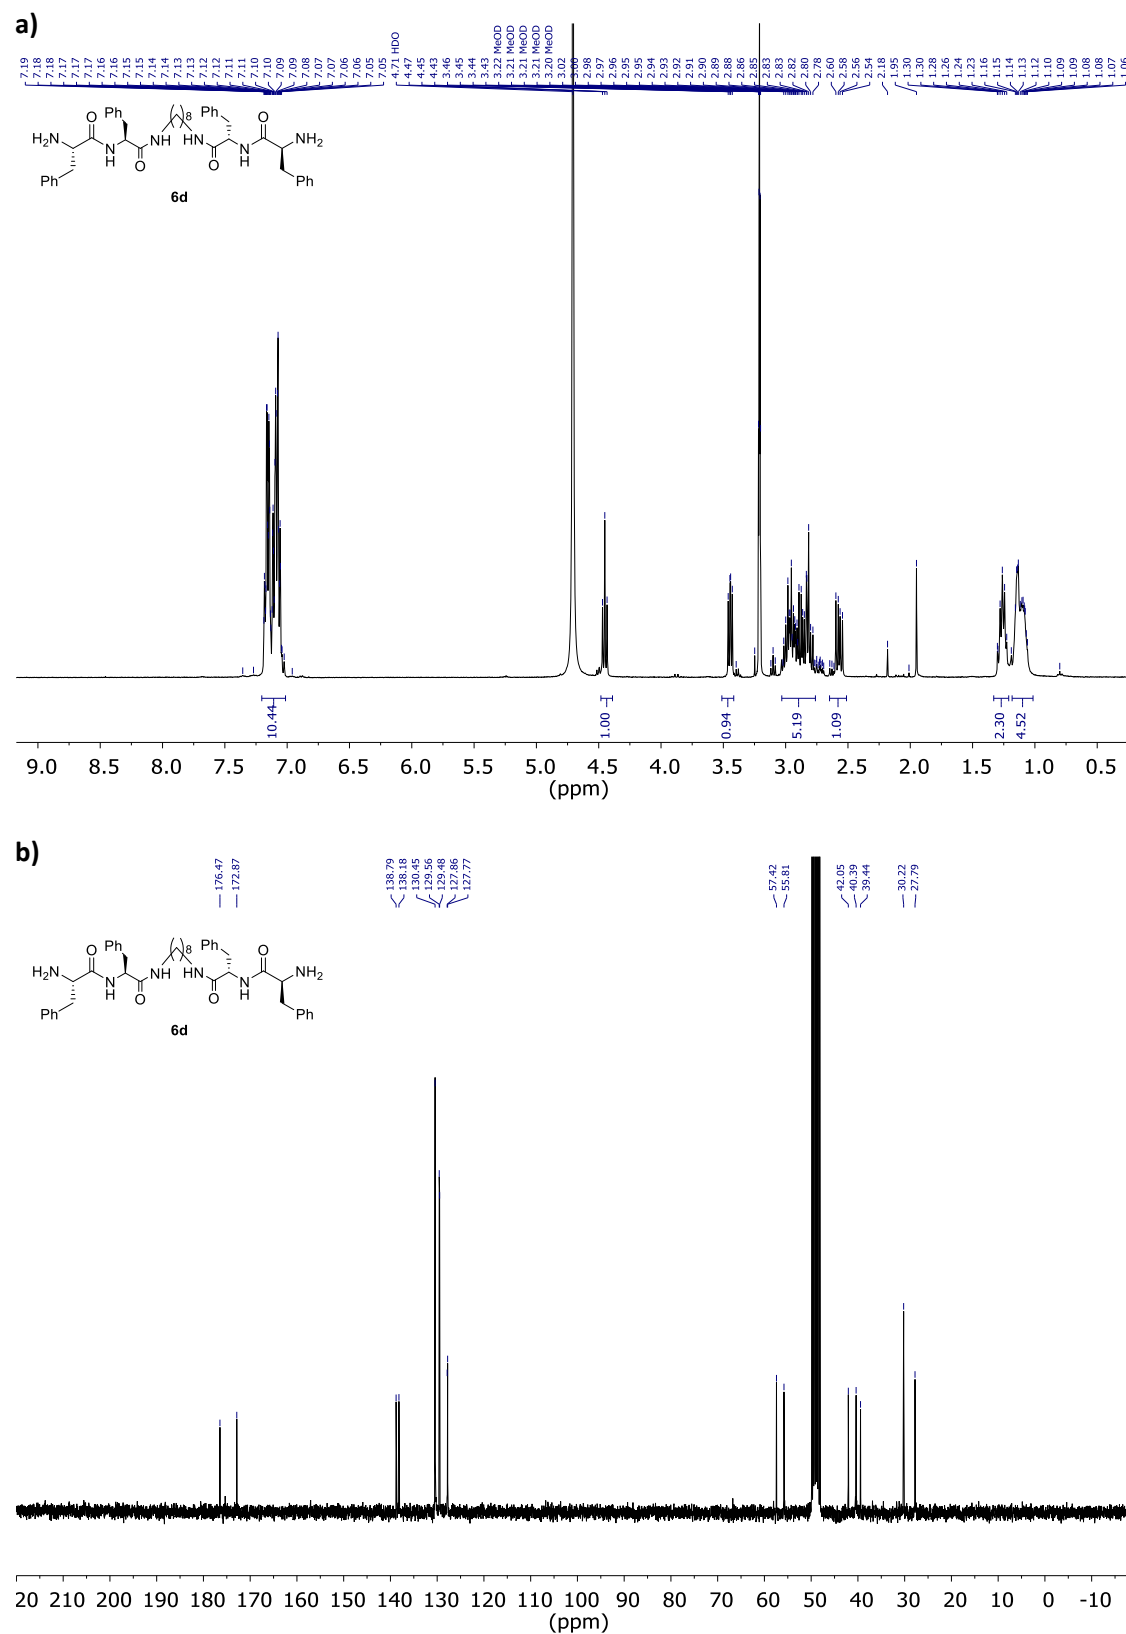

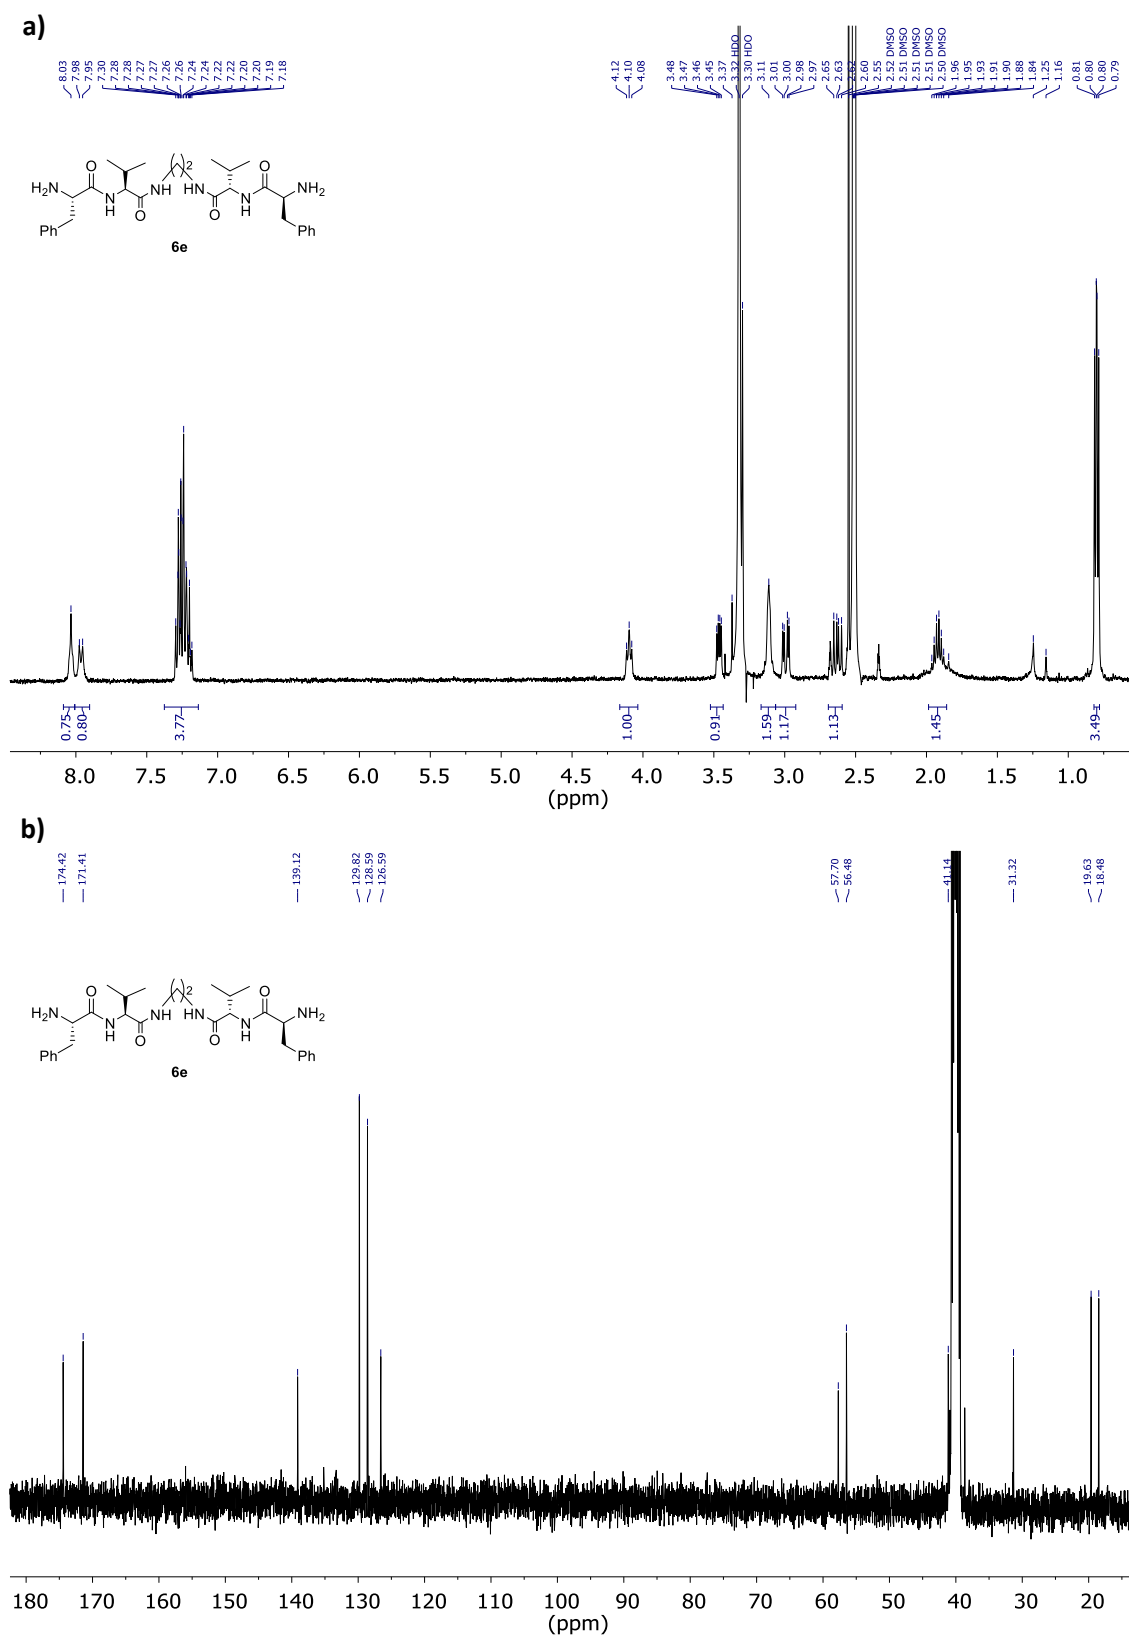

**Figure S18.** a) <sup>1</sup>H NMR (400 MHz, DMSO-d<sub>6</sub>) for **6e** (4 mM). b) <sup>13</sup>C{<sup>1</sup>H} NMR (100 MHz, CD<sub>3</sub>OD) for **6e** (4 mM).

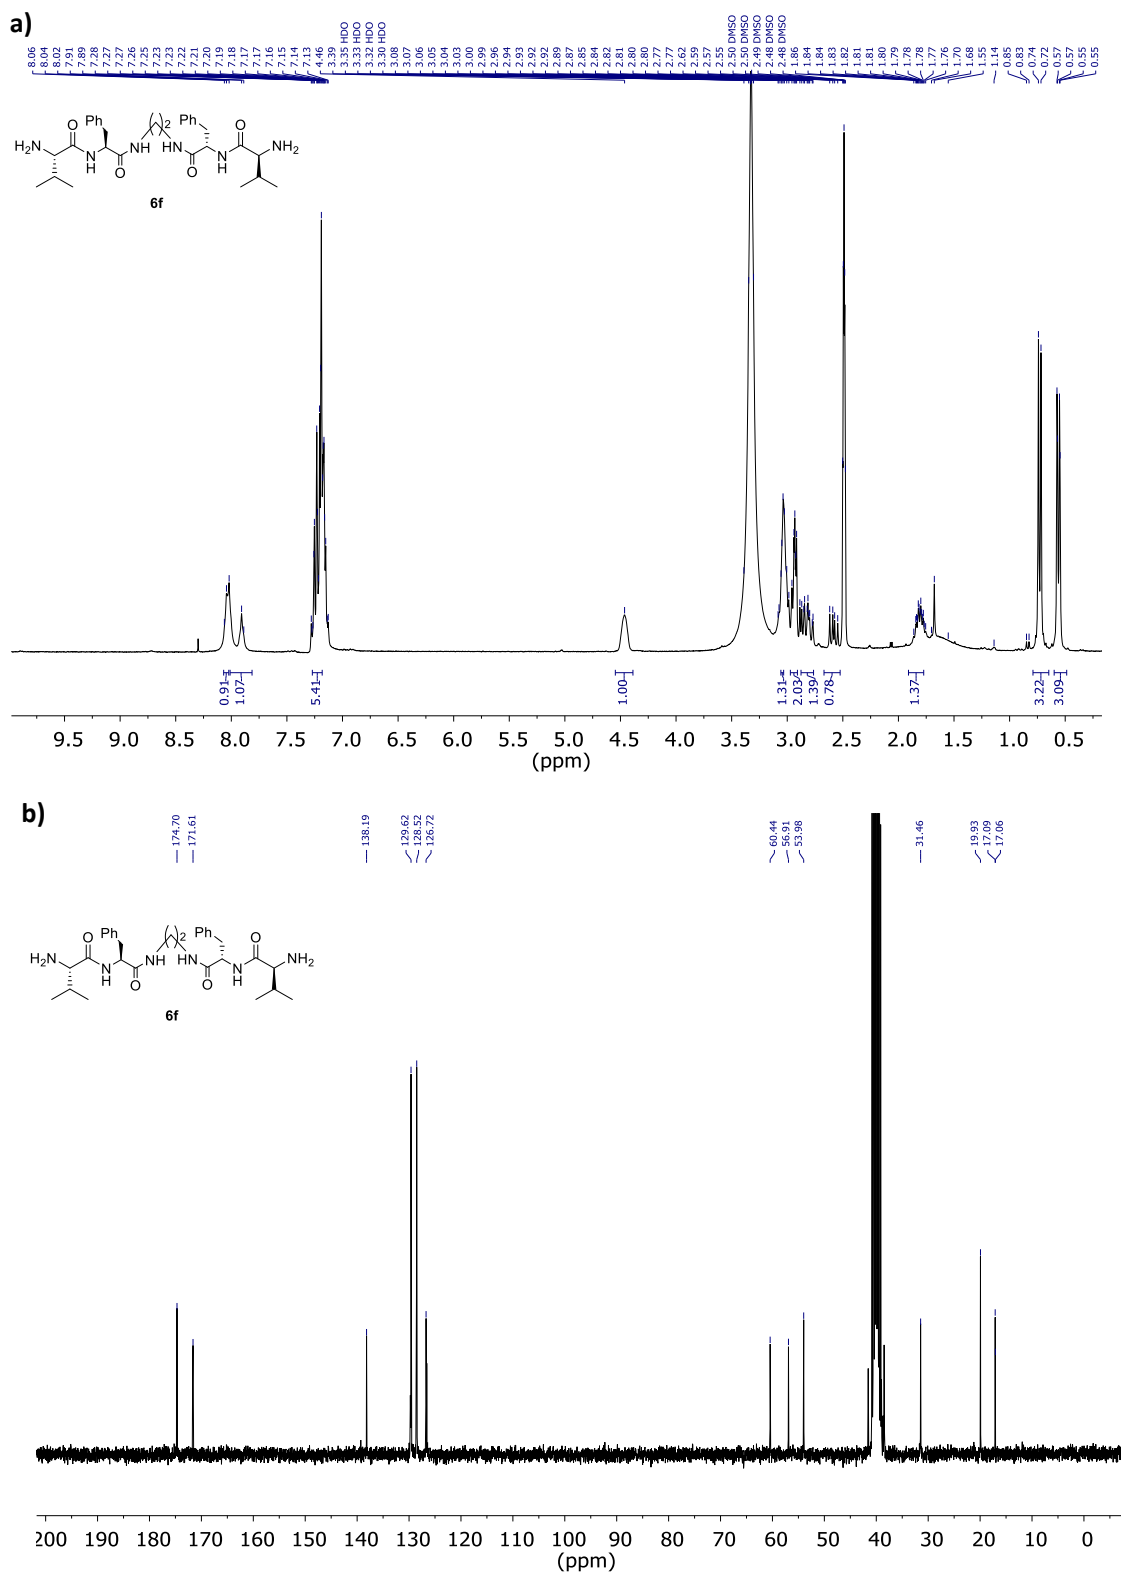

**Figure S19.** a)  $^1\text{H}$  NMR (300 MHz,  $\text{DMSO}-d_6$ ) for **6f** (10 mM). b)  $^{13}\text{C}\{^1\text{H}\}$  NMR (75 MHz,  $\text{CD}_3\text{OD}$ ) for **6f** (10 mM).

## MOLECULAR MODELLING

- Lowest energy conformation for [6b-6b] dimer.

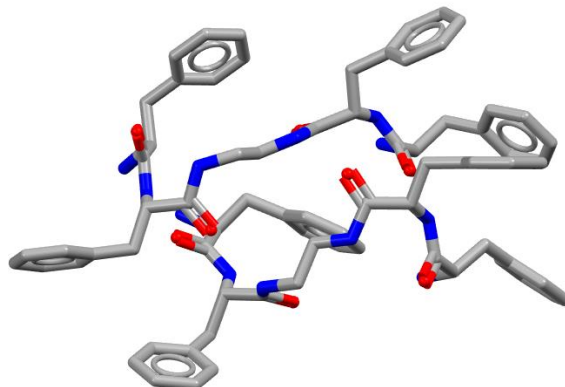

Cartesian coordinates (184 atoms), E (298 K) = 860.24 kJ/mol; E<sub>aq</sub> (298 K) = 486.59 kJ/mol

|   |    |             |             |             |
|---|----|-------------|-------------|-------------|
| C | 1  | -0.07424534 | -0.70290665 | 2.52862009  |
| H | 2  | 0.42555888  | 0.25048081  | 2.72392708  |
| H | 3  | -0.43413776 | -0.66821846 | 1.49416133  |
| C | 4  | -1.23625109 | -0.88273169 | 3.50398312  |
| H | 5  | -0.89026588 | -0.76186228 | 4.53581973  |
| H | 6  | -1.66471707 | -1.88710137 | 3.40977392  |
| N | 7  | -2.27745557 | 0.10018256  | 3.27288543  |
| H | 8  | -2.06146754 | 1.06160334  | 3.54952506  |
| N | 9  | 0.90257573  | -1.76550368 | 2.59635581  |
| H | 10 | 0.56138026  | -2.72304789 | 2.68284202  |
| C | 11 | -3.20821234 | -0.08113059 | 2.27258658  |
| C | 12 | 2.13415966  | -1.62390144 | 1.98277367  |
| O | 13 | -3.30078587 | -1.1250605  | 1.62692378  |
| O | 14 | 2.59800623  | -0.52225924 | 1.68497224  |
| C | 15 | -4.14890401 | 1.10953571  | 2.02891573  |
| H | 16 | -3.68967282 | 2.02193944  | 2.41627394  |
| C | 17 | 2.87720555  | -2.96000158 | 1.75832052  |
| H | 18 | 2.98318974  | -3.43962939 | 2.73992198  |
| N | 19 | -4.30274993 | 1.24982752  | 0.57730809  |
| N | 20 | 2.05514457  | -3.81374134 | 0.89043319  |
| H | 21 | 1.91071321  | -3.47744459 | -0.0680477  |
| C | 22 | 4.26451923  | -2.71333976 | 1.14862054  |
| H | 23 | 4.77375827  | -1.8968903  | 1.67719055  |
| C | 24 | -5.51138583 | 0.85493271  | 2.69178078  |
| C | 25 | 1.11774621  | -4.68024305 | 1.39193268  |
| H | 26 | -4.31141874 | 0.38628457  | 0.03645441  |
| C | 27 | -4.2416003  | 2.46304646  | -0.06307797 |
| O | 28 | 0.85846082  | -4.72259618 | 2.59667652  |
| O | 29 | -4.06775302 | 3.52098257  | 0.54791214  |
| C | 30 | -4.43450037 | 2.40808469  | -1.5997795  |
| H | 31 | -5.24121912 | 1.69713779  | -1.81429069 |
| C | 32 | 0.30681593  | -5.4967643  | 0.36847324  |
| H | 33 | -0.08863626 | -6.36102199 | 0.91864119  |
| N | 34 | -4.89349899 | 3.73082592  | -2.08379939 |



|   |    |             |             |             |
|---|----|-------------|-------------|-------------|
| N | 35 | -0.83794017 | -4.67388457 | -0.08014855 |
| C | 36 | -3.13118928 | 2.00118537  | -2.31042899 |
| H | 37 | -2.26725502 | 2.49341584  | -1.84490888 |
| C | 38 | 1.1678062   | -6.00593763 | -0.8008552  |
| H | 39 | -5.72663829 | 4.00047508  | -1.5596162  |
| H | 40 | -4.20154798 | 4.44596301  | -1.82685011 |
| H | 41 | -1.37438227 | -4.39407044 | 0.74461305  |
| H | 42 | -1.46560313 | -5.27811458 | -0.61162631 |
| C | 43 | 0.85856632  | 2.5539036   | 0.74625293  |
| H | 44 | -0.07204614 | 1.98951218  | 0.87344839  |
| H | 45 | 0.65066967  | 3.34554278  | 0.01686933  |
| C | 46 | 1.30803246  | 3.17219532  | 2.07397366  |
| H | 47 | 2.27883928  | 3.66542355  | 1.95649904  |
| H | 48 | 1.41538811  | 2.39807828  | 2.84092676  |
| N | 49 | 0.37443167  | 4.17511193  | 2.54714216  |
| H | 50 | 0.46527129  | 5.11444065  | 2.15385347  |
| N | 51 | 1.84595082  | 1.65695139  | 0.18100958  |
| H | 52 | 2.28361953  | 0.98510557  | 0.82008625  |
| C | 53 | -0.86475136 | 3.83994238  | 3.06367063  |
| C | 54 | 1.70435498  | 1.21231375  | -1.11940894 |
| O | 55 | -1.18517541 | 2.6864475   | 3.34876777  |
| O | 56 | 0.80394389  | 1.59841048  | -1.86445314 |
| C | 57 | -1.84150548 | 5.03377948  | 3.11944597  |
| H | 58 | -1.2985125  | 5.91628309  | 3.47929558  |
| C | 59 | 2.817532    | 0.2607308   | -1.59414314 |
| H | 60 | 3.06223637  | -0.43026917 | -0.78440521 |
| N | 61 | -2.27179494 | 5.24715285  | 1.73423847  |
| N | 62 | 2.3107315   | -0.50492421 | -2.72691499 |
| H | 63 | 1.84498743  | 0.02392702  | -3.4651268  |
| C | 64 | 4.04459475  | 1.10190653  | -1.97520591 |
| H | 65 | 4.31476288  | 1.78144999  | -1.15603306 |
| C | 66 | -3.02144964 | 4.72226456  | 4.04530874  |
| C | 67 | 1.77783331  | -1.76774176 | -2.56866196 |
| H | 68 | -2.90310373 | 4.55088672  | 1.3300356   |
| C | 69 | -1.51268572 | 5.99828446  | 0.85764421  |
| O | 70 | 1.85343117  | -2.42018076 | -1.52948382 |
| O | 71 | -0.52419945 | 6.62091387  | 1.23726144  |
| C | 72 | -1.99572011 | 5.91625272  | -0.60984401 |
| H | 73 | -1.92552215 | 4.86547466  | -0.91441742 |
| C | 74 | 1.09709395  | -2.29209228 | -3.85178833 |
| H | 75 | 0.42272125  | -3.1097491  | -3.57341248 |
| N | 76 | -3.42733542 | 6.31019614  | -0.672533   |
| N | 77 | 0.28977569  | -1.18590226 | -4.43813768 |
| C | 78 | -1.15714839 | 6.79486104  | -1.55308717 |
| C | 79 | 2.14400669  | -2.74196682 | -4.88330129 |
| H | 80 | 2.86381128  | -1.93668845 | -5.08434471 |
| H | 81 | -3.93983935 | 5.76186923  | 0.02434569  |
| H | 82 | -3.50654966 | 7.2778078   | -0.35189504 |

|   |     |             |             |             |
|---|-----|-------------|-------------|-------------|
| H | 83  | -0.39301716 | -0.87904474 | -3.73551542 |
| H | 84  | -0.27677107 | -1.56241357 | -5.19810901 |
| H | 85  | 4.17357225  | -2.38058003 | 0.10749547  |
| C | 86  | 5.15224475  | -3.93598642 | 1.19544548  |
| C | 87  | 6.76794079  | -6.22495633 | 1.29218562  |
| C | 88  | 5.08931194  | -4.89514854 | 0.17696334  |
| C | 89  | 6.03073815  | -4.13953038 | 2.26752957  |
| C | 90  | 6.83639927  | -5.27855427 | 2.31319637  |
| C | 91  | 5.89321767  | -6.03412553 | 0.22482133  |
| H | 92  | 4.40496191  | -4.75905194 | -0.65784911 |
| H | 93  | 6.09345449  | -3.41376373 | 3.07500751  |
| H | 94  | 7.51586925  | -5.42925194 | 3.14795362  |
| H | 95  | 5.83315897  | -6.77242163 | -0.57003618 |
| H | 96  | 7.39375486  | -7.11243077 | 1.33046959  |
| H | 97  | 1.4384575   | -5.18477082 | -1.47669875 |
| H | 98  | 2.12338478  | -6.39232476 | -0.42181699 |
| C | 99  | 0.4873391   | -7.09602066 | -1.59958937 |
| C | 100 | -0.79616092 | -9.11274608 | -3.06324569 |
| C | 101 | -0.323181   | -6.77349507 | -2.69679416 |
| C | 102 | 0.64253632  | -8.44115689 | -1.24067348 |
| C | 103 | 0.00423621  | -9.44440791 | -1.97130331 |
| C | 104 | -0.96049313 | -7.7774595  | -3.42606864 |
| H | 105 | -0.45542545 | -5.73389585 | -2.98885115 |
| H | 106 | 1.26397484  | -8.71618687 | -0.39121653 |
| H | 107 | 0.1315596   | -10.4860016 | -1.68782471 |
| H | 108 | -1.58444049 | -7.51875539 | -4.27728273 |
| H | 109 | -1.29209381 | -9.89578613 | -3.63077931 |
| H | 110 | -6.28267556 | 1.46438863  | 2.20117291  |
| H | 111 | -5.83055301 | -0.18549859 | 2.5440549   |
| C | 112 | -5.52604723 | 1.17404492  | 4.16808481  |
| C | 113 | -5.49568269 | 1.80504045  | 6.90071563  |
| C | 114 | -5.12279331 | 0.22158363  | 5.11264767  |
| C | 115 | -5.92546509 | 2.44187361  | 4.61165305  |
| C | 116 | -5.90626123 | 2.75714666  | 5.97071808  |
| C | 117 | -5.1069497  | 0.53717942  | 6.47225235  |
| H | 118 | -4.81350886 | -0.77334406 | 4.79787446  |
| H | 119 | -6.24988013 | 3.19856921  | 3.90078846  |
| H | 120 | -6.20997883 | 3.74762471  | 6.30121552  |
| H | 121 | -4.78968031 | -0.20766531 | 7.19755238  |
| H | 122 | -5.48149595 | 2.04986669  | 7.95939747  |
| H | 123 | -3.14289572 | 2.34270782  | -3.35464238 |
| C | 124 | -2.92092704 | 0.50381312  | -2.33393764 |
| C | 125 | -2.59733569 | -2.28002256 | -2.32774181 |
| C | 126 | -3.66958275 | -0.30253215 | -3.20324387 |
| C | 127 | -1.99907556 | -0.10135196 | -1.47279194 |
| C | 128 | -1.84206122 | -1.48662086 | -1.46699562 |
| C | 129 | -3.50786251 | -1.68843406 | -3.19965034 |
| H | 130 | -4.38748524 | 0.14743251  | -3.88665718 |

|   |     |             |             |             |
|---|-----|-------------|-------------|-------------|
| H | 131 | -1.3986506  | 0.4998996   | -0.79409524 |
| H | 132 | -1.13091687 | -1.9482967  | -0.78527935 |
| H | 133 | -4.09798145 | -2.30628558 | -3.87130389 |
| H | 134 | -2.47365626 | -3.35935132 | -2.31223659 |
| H | 135 | 1.65494228  | -2.94133053 | -5.84700106 |
| C | 136 | 2.8976559   | -3.98813765 | -4.4842781  |
| C | 137 | 4.3090153   | -6.30010256 | -3.75698224 |
| C | 138 | 4.16317063  | -3.89264032 | -3.89145775 |
| C | 139 | 2.34500734  | -5.25633847 | -4.70228587 |
| C | 140 | 3.04626317  | -6.40633383 | -4.33556588 |
| C | 141 | 4.86912684  | -5.04338658 | -3.53970474 |
| H | 142 | 4.61045502  | -2.91975168 | -3.69880114 |
| H | 143 | 1.3644154   | -5.36015533 | -5.16025413 |
| H | 144 | 2.60341951  | -7.38598923 | -4.49846946 |
| H | 145 | 5.85338594  | -4.9537623  | -3.08681862 |
| H | 146 | 4.85446198  | -7.19624486 | -3.47497434 |
| H | 147 | 3.80564439  | 1.75352577  | -2.82661401 |
| C | 148 | 5.25517091  | 0.25899454  | -2.30613928 |
| C | 149 | 7.46664275  | -1.35365837 | -2.91566727 |
| C | 150 | 5.6386036   | 0.05299278  | -3.63785671 |
| C | 151 | 5.99706901  | -0.3479425  | -1.28370198 |
| C | 152 | 7.09340081  | -1.1558066  | -1.58795085 |
| C | 153 | 6.74228634  | -0.74656924 | -3.93996456 |
| H | 154 | 5.07504477  | 0.50716175  | -4.44972006 |
| H | 155 | 5.72085222  | -0.2015821  | -0.24197485 |
| H | 156 | 7.65421938  | -1.63339561 | -0.78832181 |
| H | 157 | 7.03147506  | -0.90303005 | -4.97594269 |
| H | 158 | 8.3208891   | -1.982456   | -3.15188986 |
| H | 159 | -2.65296577 | 4.39256342  | 5.02577803  |
| H | 160 | -3.60129333 | 3.88066056  | 3.65393581  |
| C | 161 | -3.94665453 | 5.90063185  | 4.24132036  |
| C | 162 | -5.64988807 | 8.09967447  | 4.58731679  |
| C | 163 | -3.71290166 | 6.82422237  | 5.26822101  |
| C | 164 | -5.04030164 | 6.09544021  | 3.38584089  |
| C | 165 | -5.88846236 | 7.18928318  | 3.55982951  |
| C | 166 | -4.56274198 | 7.9178256   | 5.44032811  |
| H | 167 | -2.86859795 | 6.69856469  | 5.94224803  |
| H | 168 | -5.23655038 | 5.39497609  | 2.57685328  |
| H | 169 | -6.73455406 | 7.33260078  | 2.89291327  |
| H | 170 | -4.37554455 | 8.62993471  | 6.23992233  |
| H | 171 | -6.30980525 | 8.95260044  | 4.7223476   |
| H | 172 | -1.04449988 | 7.80623828  | -1.14081057 |
| H | 173 | -1.67988785 | 6.92137555  | -2.5112918  |
| C | 174 | 0.20408571  | 6.20836103  | -1.86008037 |
| C | 175 | 2.72356296  | 5.10076385  | -2.41261114 |
| C | 176 | 0.32684585  | 5.11658514  | -2.72963125 |
| C | 177 | 1.36109125  | 6.73901156  | -1.27397248 |
| C | 178 | 2.61369786  | 6.18678018  | -1.54752269 |

|   |     |            |            |             |
|---|-----|------------|------------|-------------|
| C | 179 | 1.58060258 | 4.56780074 | -3.0041861  |
| H | 180 | -0.5528371 | 4.67988815 | -3.1979653  |
| H | 181 | 1.29195948 | 7.58309446 | -0.59027071 |
| H | 182 | 3.50283133 | 6.60598597 | -1.08439286 |
| H | 183 | 1.65848917 | 3.71318613 | -3.67161864 |
| H | 184 | 3.697722   | 4.66998348 | -2.62579609 |

- Lowest energy conformation for [6e-6e] dimer.

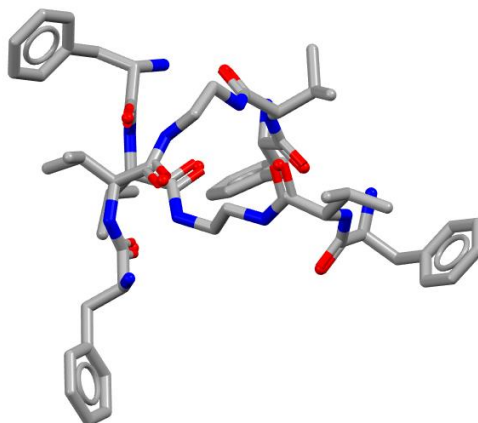

Cartesian coordinates (168 atoms), E (298 K) = 452.64 kJ/mol; E<sub>aq</sub> (298 K) = 117.75 kJ/mol

|   |    |             |             |             |
|---|----|-------------|-------------|-------------|
| C | 1  | -0.85398466 | 0.3525045   | -3.96931102 |
| H | 2  | -1.85742932 | 0.78239904  | -3.88090829 |
| H | 3  | -0.7663889  | -0.08842552 | -4.96823794 |
| C | 4  | 0.21848567  | 1.4326701   | -3.8011462  |
| H | 5  | 0.19918763  | 2.10132535  | -4.66922573 |
| H | 6  | 1.21981346  | 0.9911682   | -3.7452146  |
| N | 7  | 0.00638247  | 2.26879059  | -2.63579501 |
| H | 8  | -0.95283043 | 2.40927791  | -2.30364593 |
| N | 9  | -0.69907653 | -0.74600257 | -3.03538241 |
| H | 10 | 0.25113852  | -1.08893516 | -2.86307165 |
| C | 11 | 0.97212977  | 3.14232691  | -2.18896366 |
| C | 12 | -1.75774021 | -1.41176008 | -2.46497359 |
| O | 13 | 2.13027773  | 3.13826877  | -2.60696044 |
| O | 14 | -2.92845981 | -1.04732548 | -2.59600301 |
| C | 15 | 0.47284225  | 4.16691857  | -1.14300831 |
| H | 16 | -0.16142291 | 3.61870958  | -0.4407678  |
| C | 17 | -1.37730053 | -2.68863171 | -1.67855927 |
| H | 18 | -0.3982657  | -2.53334844 | -1.21218032 |
| N | 19 | 1.62284439  | 4.67788342  | -0.40748657 |
| N | 20 | -2.33897126 | -2.84573055 | -0.59776679 |
| H | 21 | -3.27231428 | -2.45576527 | -0.70716014 |
| C | 22 | -1.33061268 | -3.96287794 | -2.55488329 |
| H | 23 | -1.217052   | -4.8246428  | -1.8826058  |
| C | 24 | -2.61848236 | -4.19239183 | -3.35286094 |
| H | 25 | -2.76748354 | -3.41878219 | -4.11307522 |
| H | 26 | -2.58112464 | -5.1580109  | -3.86913842 |
| H | 27 | -3.49564543 | -4.20444051 | -2.69814085 |
| C | 28 | -0.12506014 | -3.9833066  | -3.4942148  |
| H | 29 | 0.80476651  | -3.88125772 | -2.92864163 |
| H | 30 | -0.17091433 | -3.18265909 | -4.23823844 |
| H | 31 | -0.07511432 | -4.93453802 | -4.03538862 |
| C | 32 | -0.34966935 | 5.29347524  | -1.80661609 |
| H | 33 | -1.12729331 | 4.83780351  | -2.43263368 |
| C | 34 | 0.48505474  | 6.19617634  | -2.72077782 |

|   |    |             |             |             |
|---|----|-------------|-------------|-------------|
| H | 35 | 0.98154157  | 5.61681232  | -3.50529135 |
| H | 36 | 1.25077918  | 6.74454662  | -2.16248533 |
| H | 37 | -0.15516513 | 6.93525943  | -3.21503269 |
| C | 38 | -1.05940914 | 6.13999391  | -0.74559702 |
| H | 39 | -0.34431166 | 6.65083896  | -0.09222378 |
| H | 40 | -1.7068064  | 5.51644736  | -0.11993658 |
| H | 41 | -1.68652617 | 6.90420892  | -1.21636782 |
| C | 42 | -2.03328287 | -3.4078714  | 0.61736538  |
| H | 43 | 2.40841203  | 5.0107761   | -0.96917051 |
| C | 44 | 2.03300859  | 4.1027591   | 0.77466633  |
| O | 45 | -0.94576338 | -3.92833377 | 0.85989805  |
| O | 46 | 1.32387921  | 3.3677977   | 1.45923475  |
| C | 47 | 3.45522796  | 4.51767668  | 1.19489654  |
| H | 48 | 3.90271909  | 3.66846485  | 1.72476685  |
| C | 49 | -3.18969099 | -3.3078696  | 1.63689252  |
| H | 50 | -3.31823261 | -2.24601418 | 1.873932    |
| N | 51 | 4.26845265  | 4.78411907  | -0.02315374 |
| N | 52 | -4.44496803 | -3.78100277 | 0.99415235  |
| C | 53 | 3.35442388  | 5.75488408  | 2.10044141  |
| H | 54 | 2.59658918  | 5.58975224  | 2.87861304  |
| C | 55 | -2.84053306 | -4.08684798 | 2.91836368  |
| H | 56 | -2.70128333 | -5.15106906 | 2.68434075  |
| H | 57 | 5.21756132  | 5.01700852  | 0.27669175  |
| H | 58 | 4.35617029  | 3.9123573   | -0.55301284 |
| H | 59 | -4.36251945 | -4.78249747 | 0.8217001   |
| H | 60 | -5.20006951 | -3.68051753 | 1.6752476   |
| C | 61 | 1.3423993   | -0.05765376 | 0.09390364  |
| H | 62 | 1.83160207  | 0.88057954  | -0.19023441 |
| H | 63 | 0.5064104   | -0.20488317 | -0.59472041 |
| C | 64 | 0.83540215  | 0.02499858  | 1.53553905  |
| H | 65 | 1.6631425   | 0.24476688  | 2.21829561  |
| H | 66 | 0.397094    | -0.93270027 | 1.83921291  |
| N | 67 | -0.1485379  | 1.07677352  | 1.69887821  |
| H | 68 | 0.21618651  | 2.03329078  | 1.71250464  |
| N | 69 | 2.31172822  | -1.11513428 | -0.09337392 |
| H | 70 | 2.87450732  | -1.42748946 | 0.69932581  |
| C | 71 | -1.46658213 | 0.87760836  | 1.35362564  |
| C | 72 | 2.52341509  | -1.73459369 | -1.30768908 |
| O | 73 | -1.91579578 | -0.23479128 | 1.07901717  |
| O | 74 | 1.8631022   | -1.47518054 | -2.31286798 |
| C | 75 | -2.35570252 | 2.14086228  | 1.39059223  |
| H | 76 | -1.77420782 | 2.98093338  | 0.99657024  |
| C | 77 | 3.61987719  | -2.82918939 | -1.2565624  |
| H | 78 | 4.47282248  | -2.43128514 | -0.69172549 |
| N | 79 | -3.4857317  | 1.93302562  | 0.48549397  |
| N | 80 | 3.04953593  | -3.94503106 | -0.51000766 |
| H | 81 | 2.40407128  | -4.59309835 | -0.96130281 |
| C | 82 | 4.08479715  | -3.25824969 | -2.66621409 |

|   |     |             |             |             |
|---|-----|-------------|-------------|-------------|
| H | 83  | 3.21299058  | -3.52510546 | -3.27668768 |
| C | 84  | 4.82627311  | -2.11487505 | -3.3707866  |
| H | 85  | 5.71501972  | -1.81288696 | -2.80596194 |
| H | 86  | 5.15172311  | -2.42282802 | -4.3704296  |
| H | 87  | 4.1896193   | -1.2338188  | -3.49362402 |
| C | 88  | 5.00457791  | -4.48316007 | -2.61397052 |
| H | 89  | 5.37613761  | -4.73484164 | -3.61322481 |
| H | 90  | 4.4706947   | -5.3612469  | -2.23891749 |
| H | 91  | 5.86955789  | -4.30227979 | -1.9671104  |
| C | 92  | -2.85623379 | 2.49713055  | 2.80844222  |
| H | 93  | -3.62399109 | 3.27579797  | 2.69724567  |
| C | 94  | -1.74803749 | 3.09726904  | 3.67765541  |
| H | 95  | -1.25609669 | 3.93084528  | 3.16563228  |
| H | 96  | -2.1646865  | 3.48397529  | 4.6142222   |
| H | 97  | -0.98720809 | 2.35596654  | 3.93969706  |
| C | 98  | -3.51303163 | 1.32081132  | 3.53761138  |
| H | 99  | -4.3308849  | 0.8919982   | 2.95040505  |
| H | 100 | -3.93372794 | 1.65048658  | 4.49396236  |
| H | 101 | -2.79176612 | 0.52588353  | 3.75241669  |
| C | 102 | 2.98975515  | -3.97409091 | 0.86516206  |
| H | 103 | -4.08179551 | 1.12444438  | 0.66794332  |
| C | 104 | -3.36660563 | 2.15880826  | -0.87243707 |
| O | 105 | 3.51288615  | -3.11701086 | 1.57589927  |
| O | 106 | -2.39076732 | 2.69640564  | -1.39102995 |
| C | 107 | -4.59929769 | 1.70086203  | -1.67820346 |
| H | 108 | -4.30164971 | 1.59970712  | -2.72849399 |
| C | 109 | 2.21303549  | -5.17811253 | 1.42906063  |
| H | 110 | 1.61821916  | -4.80183395 | 2.27104837  |
| N | 111 | -5.00827363 | 0.36029787  | -1.17920545 |
| N | 112 | 1.24360872  | -5.68307813 | 0.4154719   |
| C | 113 | -5.75372555 | 2.701539    | -1.51916628 |
| C | 114 | 3.17254566  | -6.25610296 | 1.96074942  |
| H | 115 | 3.73709564  | -5.83672699 | 2.8049522   |
| H | 116 | -5.79535649 | 0.03531013  | -1.74181501 |
| H | 117 | -4.24552381 | -0.28281012 | -1.45286572 |
| H | 118 | 0.48217812  | -4.98179171 | 0.37078905  |
| H | 119 | 0.77784855  | -6.50227327 | 0.80569279  |
| H | 120 | 2.98849672  | 6.61946171  | 1.52965491  |
| C | 121 | 4.66088652  | 6.10131781  | 2.77656863  |
| C | 122 | 7.10245095  | 6.71764355  | 4.00843118  |
| C | 123 | 5.08811347  | 5.38677933  | 3.90412554  |
| C | 124 | 5.4718631   | 7.12730708  | 2.27321704  |
| C | 125 | 6.68693036  | 7.4335352   | 2.88732498  |
| C | 126 | 6.30354712  | 5.69510853  | 4.51682616  |
| H | 127 | 4.47535653  | 4.58713989  | 4.31465549  |
| H | 128 | 5.16157438  | 7.69262759  | 1.39664448  |
| H | 129 | 7.30905278  | 8.23184849  | 2.49101495  |
| H | 130 | 6.62682762  | 5.13824892  | 5.39252796  |

|   |     |             |             |             |
|---|-----|-------------|-------------|-------------|
| H | 131 | 8.0481586   | 6.95790548  | 4.48704924  |
| H | 132 | -1.87221719 | -3.74826489 | 3.31145298  |
| C | 133 | -3.86778916 | -3.93278223 | 4.0170831   |
| C | 134 | -5.79041922 | -3.62740348 | 6.03475412  |
| C | 135 | -4.71481999 | -4.99576664 | 4.35768116  |
| C | 136 | -3.99291211 | -2.71668129 | 4.7029121   |
| C | 137 | -4.95078088 | -2.5651253  | 5.7060055   |
| C | 138 | -5.67188301 | -4.84222277 | 5.36203343  |
| H | 139 | -4.63578616 | -5.95113573 | 3.84415475  |
| H | 140 | -3.34270471 | -1.87931834 | 4.45876128  |
| H | 141 | -5.04073749 | -1.61799138 | 6.2314845   |
| H | 142 | -6.32501119 | -5.67149713 | 5.62118349  |
| H | 143 | -6.53558822 | -3.50920594 | 6.81697964  |
| H | 144 | -6.6731565  | 2.28716709  | -1.95477525 |
| H | 145 | -5.98062613 | 2.8729954   | -0.45844382 |
| C | 146 | -5.47694673 | 4.02595869  | -2.19392494 |
| C | 147 | -4.92007553 | 6.46874783  | -3.45229767 |
| C | 148 | -5.03601497 | 5.12626853  | -1.44655479 |
| C | 149 | -5.63259388 | 4.16337802  | -3.58006014 |
| C | 150 | -5.35555533 | 5.38003677  | -4.20517369 |
| C | 151 | -4.76132124 | 6.34211954  | -2.07384154 |
| H | 152 | -4.89686765 | 5.04157292  | -0.37088395 |
| H | 153 | -5.97010185 | 3.32282136  | -4.18222146 |
| H | 154 | -5.47886677 | 5.47832692  | -5.28046433 |
| H | 155 | -4.41889754 | 7.18977597  | -1.48627466 |
| H | 156 | -4.70349349 | 7.41551094  | -3.93968498 |
| H | 157 | 2.59121399  | -7.08242509 | 2.39210772  |
| C | 158 | 4.15633018  | -6.83202223 | 0.96783378  |
| C | 159 | 6.00018799  | -7.9104817  | -0.85244598 |
| C | 160 | 5.47724555  | -6.36281151 | 0.92775645  |
| C | 161 | 3.77090863  | -7.84370123 | 0.07880504  |
| C | 162 | 4.6884673   | -8.3797553  | -0.82652986 |
| C | 163 | 6.39429762  | -6.901537   | 0.02377311  |
| H | 164 | 5.80073677  | -5.57142608 | 1.60099813  |
| H | 165 | 2.75062585  | -8.21936647 | 0.08385449  |
| H | 166 | 4.37788695  | -9.16317128 | -1.51253829 |
| H | 167 | 7.41536186  | -6.53038021 | 0.00184649  |
| H | 168 | 6.7135137   | -8.32789884 | -1.5577239  |



- Lowest energy conformation for [6f-6f] dimer.

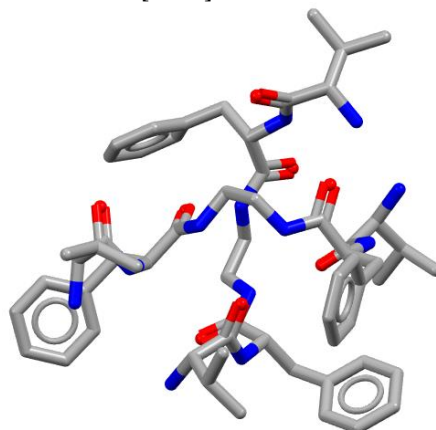

Cartesian coordinates (168 atoms), E (298 K) = 561.21 kJ/mol; E<sub>aq</sub> (298 K) = 221.23 kJ/mol

|   |    |             |             |             |
|---|----|-------------|-------------|-------------|
| C | 1  | -1.77004874 | 0.40842475  | -2.24486284 |
| H | 2  | -2.84426189 | 0.4326522   | -2.45698112 |
| H | 3  | -1.23174844 | 0.59633922  | -3.17993103 |
| C | 4  | -1.42990062 | 1.47221852  | -1.19787881 |
| H | 5  | -1.82764285 | 1.19060923  | -0.21919222 |
| H | 6  | -1.86753143 | 2.43472124  | -1.48316857 |
| N | 7  | 0.00276472  | 1.67991286  | -1.07746246 |
| H | 8  | 0.55840432  | 1.68165447  | -1.92513557 |
| N | 9  | -1.40483229 | -0.92690847 | -1.8045071  |
| H | 10 | -0.40440027 | -1.14411721 | -1.78685019 |
| C | 11 | 0.55686854  | 2.36190226  | -0.01441851 |
| C | 12 | -2.26633876 | -1.68121559 | -1.03943811 |
| O | 13 | -0.05377661 | 2.57924741  | 1.02998695  |
| O | 14 | -3.42895493 | -1.33479361 | -0.81258044 |
| C | 15 | 2.0638029   | 2.64849014  | -0.18059971 |
| H | 16 | 2.56584857  | 1.71052644  | 0.07797242  |
| C | 17 | -1.70457648 | -3.02119007 | -0.5241505  |
| H | 18 | -0.62719961 | -2.93212872 | -0.36466667 |
| N | 19 | 2.44434288  | 2.88615116  | -1.57799918 |
| N | 20 | -2.35260009 | -3.2901167  | 0.76314176  |
| H | 21 | -3.36326475 | -3.43385719 | 0.76405908  |
| C | 22 | -2.0374329  | -4.14848028 | -1.50922922 |
| H | 23 | -3.11541933 | -4.15206099 | -1.72278492 |
| C | 24 | 2.52941933  | 3.74778659  | 0.79218049  |
| C | 25 | -1.92231443 | -2.70700843 | 1.93489821  |
| H | 26 | 3.37162037  | 2.57366721  | -1.86001383 |
| C | 27 | 2.0898861   | 4.04681739  | -2.23676818 |
| O | 28 | -0.82420807 | -2.169695   | 2.05861579  |
| O | 29 | 1.17158237  | 4.77812287  | -1.88563354 |
| C | 30 | 2.9527436   | 4.31927145  | -3.49018798 |
| H | 31 | 3.11677754  | 5.40419106  | -3.51494084 |
| C | 32 | -2.93601639 | -2.84326049 | 3.09949521  |
| H | 33 | -2.92876142 | -1.89380145 | 3.6441853   |
| N | 34 | 4.28660742  | 3.67670707  | -3.32473477 |

|   |    |             |             |             |
|---|----|-------------|-------------|-------------|
| N | 35 | -4.30689452 | -3.02422982 | 2.54574498  |
| C | 36 | 2.21229763  | 3.87919308  | -4.77289018 |
| H | 37 | 1.19525067  | 4.29235005  | -4.73158109 |
| C | 38 | 2.88223885  | 4.45079941  | -6.02693023 |
| H | 39 | 3.88071115  | 4.03014647  | -6.18348495 |
| H | 40 | 2.28470837  | 4.22775618  | -6.91761092 |
| H | 41 | 2.97674638  | 5.5394624   | -5.95632321 |
| C | 42 | 2.07326155  | 2.36005008  | -4.91400131 |
| H | 43 | 3.04961792  | 1.8712673   | -4.99117107 |
| H | 44 | 1.50634388  | 2.10929181  | -5.81741361 |
| H | 45 | 1.53726832  | 1.9255895   | -4.06559153 |
| C | 46 | -2.58826525 | -3.99785501 | 4.06618393  |
| H | 47 | -3.36061036 | -4.01503992 | 4.84811358  |
| C | 48 | -2.58643322 | -5.3812256  | 3.40774981  |
| H | 49 | -2.39054955 | -6.15935399 | 4.15375315  |
| H | 50 | -1.81514653 | -5.46300979 | 2.63667684  |
| H | 51 | -3.55349834 | -5.60737907 | 2.94793502  |
| C | 52 | -1.2541409  | -3.75536224 | 4.77935435  |
| H | 53 | -1.23801005 | -2.76769229 | 5.25190087  |
| H | 54 | -1.09916349 | -4.50189321 | 5.56597524  |
| H | 55 | -0.40499775 | -3.82069228 | 4.09245933  |
| H | 56 | 4.85131464  | 3.8943978   | -4.14682451 |
| H | 57 | 4.76526268  | 4.147417    | -2.54890479 |
| H | 58 | -4.95390289 | -3.11405254 | 3.33093065  |
| H | 59 | -4.59288459 | -2.13806898 | 2.09936766  |
| C | 60 | 1.28352906  | 0.52025725  | 3.59140951  |
| H | 61 | 1.98231369  | 0.20721732  | 4.37492888  |
| H | 62 | 1.67351363  | 1.44334626  | 3.14926663  |
| C | 63 | -0.1032785  | 0.74665943  | 4.1940376   |
| H | 64 | -0.03331578 | 1.44729798  | 5.03310683  |
| H | 65 | -0.52127587 | -0.19211103 | 4.57436236  |
| N | 66 | -1.02712022 | 1.32419008  | 3.24089806  |
| H | 67 | -0.65371158 | 1.96995127  | 2.53617615  |
| N | 68 | 1.2931704   | -0.51739556 | 2.57836467  |
| H | 69 | 0.4389647   | -1.0665937  | 2.43201591  |
| C | 70 | -2.38878121 | 1.29328803  | 3.41815445  |
| C | 71 | 2.36964381  | -0.73218585 | 1.75335582  |
| O | 72 | -2.93755522 | 0.62310967  | 4.29406823  |
| O | 73 | 3.38139252  | -0.0286335  | 1.77980935  |
| C | 74 | -3.18475861 | 2.1696103   | 2.43409926  |
| H | 75 | -2.59321512 | 2.34228654  | 1.53193659  |
| C | 76 | 2.24846403  | -1.9691543  | 0.83990285  |
| H | 77 | 1.21844724  | -2.04726238 | 0.48581067  |
| N | 78 | -4.37348548 | 1.41901815  | 2.04813478  |
| N | 79 | 3.12438042  | -1.75479451 | -0.3078973  |
| H | 80 | 4.10573038  | -1.56014715 | -0.10963583 |
| C | 81 | 2.65655235  | -3.19974019 | 1.66140818  |
| H | 82 | 3.72586885  | -3.15248305 | 1.91030734  |

|   |     |             |             |             |
|---|-----|-------------|-------------|-------------|
| C | 83  | -3.55927947 | 3.50604783  | 3.09013392  |
| H | 84  | -4.2780999  | 4.04687485  | 2.46003477  |
| C | 85  | 2.67504364  | -1.1048477  | -1.43840886 |
| H | 86  | -4.58327313 | 0.55979217  | 2.55131546  |
| C | 87  | -4.9617484  | 1.56405415  | 0.8134318   |
| O | 88  | 1.48782004  | -0.95703016 | -1.71706443 |
| O | 89  | -4.63483962 | 2.42412249  | 0.0003095   |
| C | 90  | -6.10387235 | 0.55585011  | 0.55263016  |
| H | 91  | -6.32904279 | 0.58000558  | -0.52069982 |
| C | 92  | 3.82611824  | -0.58185316 | -2.33656608 |
| H | 93  | 3.50042164  | 0.3801809   | -2.74749236 |
| N | 94  | -5.59380009 | -0.80226626 | 0.88675028  |
| N | 95  | 5.01897074  | -0.31042699 | -1.48701099 |
| C | 96  | -7.36413118 | 0.90615514  | 1.37937711  |
| H | 97  | -7.11209892 | 0.91348099  | 2.44819321  |
| C | 98  | -7.88574103 | 2.30417128  | 1.0205987   |
| H | 99  | -8.79461079 | 2.537132    | 1.5860709   |
| H | 100 | -8.12384179 | 2.37620788  | -0.04612066 |
| H | 101 | -7.15040666 | 3.07891726  | 1.25936141  |
| C | 102 | -8.4947486  | -0.10936443 | 1.17229612  |
| H | 103 | -8.749345   | -0.20746068 | 0.11153278  |
| H | 104 | -9.39843941 | 0.19966064  | 1.70904807  |
| H | 105 | -8.22017041 | -1.09824391 | 1.55237017  |
| C | 106 | 4.18737628  | -1.54479304 | -3.48719184 |
| H | 107 | 5.0712544   | -1.13937378 | -3.99930092 |
| C | 108 | 4.54375806  | -2.96011537 | -3.02429875 |
| H | 109 | 4.88763555  | -3.56350651 | -3.87167475 |
| H | 110 | 5.34803521  | -2.94921181 | -2.28222215 |
| H | 111 | 3.67938266  | -3.47123483 | -2.58932675 |
| C | 112 | 3.06906519  | -1.60055035 | -4.53082875 |
| H | 113 | 3.34542222  | -2.25627414 | -5.36338231 |
| H | 114 | 2.13584702  | -1.97360117 | -4.10279428 |
| H | 115 | 2.87421059  | -0.60648314 | -4.94422258 |
| H | 116 | -6.26818024 | -1.48280245 | 0.53232848  |
| H | 117 | -4.77229348 | -0.95101875 | 0.26845592  |
| H | 118 | 4.77967851  | 0.41758698  | -0.80823961 |
| H | 119 | 5.74868019  | 0.09559538  | -2.0742433  |
| H | 120 | 2.33520471  | 3.44240116  | 1.82844281  |
| H | 121 | 1.93568838  | 4.65895755  | 0.64589523  |
| C | 122 | 4.00237768  | 4.07245118  | 0.66047701  |
| C | 123 | 6.72648752  | 4.65644526  | 0.35089958  |
| C | 124 | 4.97619833  | 3.13985482  | 1.0412513   |
| C | 125 | 4.41027443  | 5.30734999  | 0.13660965  |
| C | 126 | 5.76645209  | 5.59662044  | -0.0185283  |
| C | 127 | 6.33173038  | 3.43020974  | 0.8830697   |
| H | 128 | 4.68587866  | 2.18388411  | 1.4741502   |
| H | 129 | 3.67009658  | 6.0518855   | -0.15192604 |
| H | 130 | 6.07397779  | 6.56003119  | -0.41719295 |

|   |     |             |             |             |
|---|-----|-------------|-------------|-------------|
| H | 131 | 7.07961418  | 2.70226832  | 1.18789334  |
| H | 132 | 7.78336604  | 4.88472505  | 0.2394228   |
| H | 133 | -1.84069414 | -5.11975048 | -1.03420891 |
| C | 134 | -1.27236529 | -4.10808189 | -2.80870732 |
| C | 135 | 0.12996912  | -4.1018239  | -5.23709223 |
| C | 136 | 0.0658492   | -4.51651352 | -2.85810221 |
| C | 137 | -1.89464061 | -3.67850971 | -3.98854295 |
| C | 138 | -1.19504746 | -3.67351642 | -5.19624958 |
| C | 139 | 0.75973602  | -4.52352112 | -4.06807054 |
| H | 140 | 0.57716329  | -4.84054728 | -1.95550152 |
| H | 141 | -2.9304854  | -3.34596235 | -3.97609028 |
| H | 142 | -1.68679391 | -3.33940325 | -6.1058951  |
| H | 143 | 1.79530294  | -4.85188048 | -4.09399316 |
| H | 144 | 0.67325873  | -4.10226306 | -6.17791961 |
| H | 145 | 2.13985375  | -3.19689007 | 2.63077784  |
| C | 146 | 2.37095413  | -4.51606018 | 0.97733018  |
| C | 147 | 1.84425553  | -6.98077646 | -0.25343988 |
| C | 148 | 3.3154274   | -5.10045629 | 0.12411761  |
| C | 149 | 1.15532506  | -5.17642647 | 1.19667626  |
| C | 150 | 0.89460302  | -6.40469432 | 0.58793906  |
| C | 151 | 3.05260124  | -6.32701695 | -0.48840669 |
| H | 152 | 4.26451276  | -4.60422501 | -0.06587337 |
| H | 153 | 0.40583471  | -4.73887493 | 1.85110914  |
| H | 154 | -0.05011327 | -6.91039037 | 0.77011636  |
| H | 155 | 3.79304405  | -6.77382275 | -1.14657332 |
| H | 156 | 1.64121522  | -7.93683005 | -0.72864952 |
| H | 157 | -4.0834049  | 3.32718208  | 4.03865656  |
| C | 158 | -2.37128495 | 4.40906306  | 3.32862667  |
| C | 159 | -0.12002912 | 6.02727696  | 3.7475577   |
| C | 160 | -1.83536179 | 4.56098605  | 4.61426939  |
| C | 161 | -1.76829899 | 5.08080314  | 2.25683515  |
| C | 162 | -0.64679501 | 5.88412178  | 2.46574264  |
| C | 163 | -0.71495399 | 5.36741506  | 4.8215663   |
| H | 164 | -2.28207244 | 4.04457554  | 5.46124961  |
| H | 165 | -2.15790936 | 4.96662895  | 1.24638604  |
| H | 166 | -0.18206588 | 6.38943386  | 1.62303362  |
| H | 167 | -0.30466578 | 5.4784114   | 5.82159382  |
| H | 168 | 0.754536    | 6.65150135  | 3.90826041  |

- Lowest energy conformation for [6b-CO<sub>2</sub>] symmetric dimer.

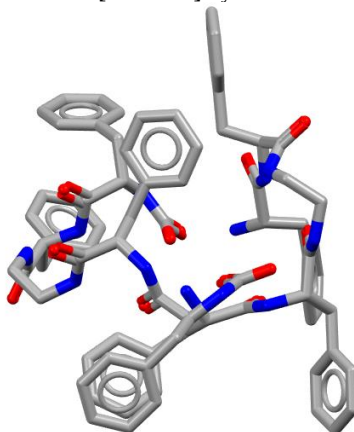

Cartesian coordinates (190 atoms), E (298 K) = -1425.94 kJ/mol; E<sub>aq</sub> (298 K) = -1965.74 kJ/mol

|    |   |             |             |             |
|----|---|-------------|-------------|-------------|
| 1  | C | -5.85932615 | -0.87615703 | -0.5986871  |
| 2  | H | -6.62412105 | -1.57422255 | -0.9545943  |
| 3  | H | -6.36229324 | -0.02839371 | -0.121427   |
| 4  | C | -5.00135098 | -0.42433356 | -1.78172486 |
| 5  | H | -5.65196828 | -0.12820136 | -2.61183106 |
| 6  | H | -4.35383791 | -1.23558569 | -2.12518271 |
| 7  | N | -4.15122315 | 0.69882944  | -1.44668485 |
| 8  | H | -3.27373957 | 0.49690845  | -0.98092605 |
| 9  | N | -5.09886255 | -1.59511563 | 0.4079119   |
| 10 | H | -4.74980546 | -2.51887229 | 0.099459    |
| 11 | C | -4.67253981 | 1.97609454  | -1.36698306 |
| 12 | C | -4.45790228 | -1.00286287 | 1.47542369  |
| 13 | O | -5.80568513 | 2.25907656  | -1.74845484 |
| 14 | O | -4.34010266 | 0.2157834   | 1.62021568  |
| 15 | C | -3.70878258 | 3.02457682  | -0.79333673 |
| 16 | H | -4.27669569 | 3.94336339  | -0.60084103 |
| 17 | C | -3.85281109 | -2.03060031 | 2.45284059  |
| 18 | H | -4.30198851 | -3.00601319 | 2.22237993  |
| 19 | N | -3.23799348 | 2.53422001  | 0.51055705  |
| 20 | N | -2.43278217 | -2.21175206 | 2.16810407  |
| 21 | H | -2.26488843 | -2.71210722 | 1.2887696   |
| 22 | C | -4.2224575  | -1.67918876 | 3.9019574   |
| 23 | H | -5.3119047  | -1.5562391  | 3.9779365   |
| 24 | C | -2.54479836 | 3.27953697  | -1.76455441 |
| 25 | C | -1.38442887 | -1.44174756 | 2.6166071   |
| 26 | H | -3.66642609 | 1.67440862  | 0.874277    |
| 27 | C | -2.58110543 | 3.36732383  | 1.37801231  |
| 28 | O | -1.5116828  | -0.4811089  | 3.37069819  |
| 29 | O | -2.28679258 | 4.53636833  | 1.11742918  |
| 30 | C | -2.20681144 | 2.77593261  | 2.740864    |
| 31 | H | -2.06971906 | 1.69867208  | 2.66441096  |
| 32 | C | -0.01516767 | -1.95028725 | 2.11212739  |
| 33 | H | -0.0091347  | -3.03955337 | 2.24750032  |

|    |   |             |             |             |
|----|---|-------------|-------------|-------------|
| 34 | C | -3.29942925 | 3.14492632  | 3.75694172  |
| 35 | H | -4.16630271 | 2.48614618  | 3.61356991  |
| 36 | C | 1.14006396  | -1.31151754 | 2.88927892  |
| 37 | C | 4.58373925  | -3.10817606 | -2.56789338 |
| 38 | H | 4.86570444  | -4.06109345 | -3.02852301 |
| 39 | H | 4.82814012  | -3.15739531 | -1.50221441 |
| 40 | C | 5.34465642  | -1.95652632 | -3.23956413 |
| 41 | H | 5.1338721   | -1.91971959 | -4.31289012 |
| 42 | H | 6.42183032  | -2.10863426 | -3.11117897 |
| 43 | N | 4.99157071  | -0.65456769 | -2.70011162 |
| 44 | H | 4.24979095  | -0.12569056 | -3.16067833 |
| 45 | N | 3.14355242  | -2.9596148  | -2.66233623 |
| 46 | H | 2.60250845  | -3.02505993 | -1.80117515 |
| 47 | C | 5.4970596   | -0.16344456 | -1.52147955 |
| 48 | C | 2.45903156  | -3.13617663 | -3.84170607 |
| 49 | O | 6.36520459  | -0.76730452 | -0.89141145 |
| 50 | O | 3.02060189  | -3.44239455 | -4.89261985 |
| 51 | C | 4.99739091  | 1.25257946  | -1.12234996 |
| 52 | H | 5.35173652  | 1.93982722  | -1.90232479 |
| 53 | C | 0.9361494   | -2.87517062 | -3.77371629 |
| 54 | H | 0.59222863  | -3.00502628 | -4.80955391 |
| 55 | N | 3.53137315  | 1.3658297   | -1.0688841  |
| 56 | N | 0.19965329  | -3.89664055 | -3.02194083 |
| 57 | H | -0.70733212 | -4.15895423 | -3.39719168 |
| 58 | C | 0.64524946  | -1.43430317 | -3.31721017 |
| 59 | H | 1.5526618   | -0.82524627 | -3.38690848 |
| 60 | C | 5.62758191  | 1.64470161  | 0.2318531   |
| 61 | C | 0.31990592  | -4.10600413 | -1.66477874 |
| 62 | H | 3.14827827  | 1.87066709  | -0.27552041 |
| 63 | C | 2.77453082  | 1.56784022  | -2.20086126 |
| 64 | O | 1.15788422  | -3.53264662 | -0.96404509 |
| 65 | O | 3.17826113  | 1.25044291  | -3.31987711 |
| 66 | C | 1.37176322  | 2.17966382  | -1.95361244 |
| 67 | H | 0.64533813  | 1.3871836   | -2.16898745 |
| 68 | C | -0.65256289 | -5.17786254 | -1.10591996 |
| 69 | H | -0.54437774 | -5.20856145 | -0.01341291 |
| 70 | C | 1.11158545  | 3.29474873  | -2.99330669 |
| 71 | C | -0.30641421 | -6.56149843 | -1.68764728 |
| 72 | H | -0.37857914 | -6.55689964 | -2.78308895 |
| 73 | H | -3.81780553 | -0.70380536 | 4.18764159  |
| 74 | C | -3.80421913 | -2.73259133 | 4.90469081  |
| 75 | C | -3.0193783  | -4.69743582 | 6.74809418  |
| 76 | C | -2.73779767 | -2.50044648 | 5.78394953  |
| 77 | C | -4.47479884 | -3.96231446 | 4.96439458  |
| 78 | C | -4.08285293 | -4.93927426 | 5.88102337  |
| 79 | C | -2.34727619 | -3.47808691 | 6.70034303  |

|     |   |             |             |             |
|-----|---|-------------|-------------|-------------|
| 80  | H | -2.2019812  | -1.5550942  | 5.7600828   |
| 81  | H | -5.30950837 | -4.16918251 | 4.29773885  |
| 82  | H | -4.61006251 | -5.88920132 | 5.91927025  |
| 83  | H | -1.52079306 | -3.28761651 | 7.37971933  |
| 84  | H | -2.71783425 | -5.45840884 | 7.46305971  |
| 85  | H | 1.28840281  | -0.26569429 | 2.59497193  |
| 86  | H | 0.90270391  | -1.27654386 | 3.96124239  |
| 87  | C | 2.42590042  | -2.08674195 | 2.72752328  |
| 88  | C | 4.77141427  | -3.57911732 | 2.39002694  |
| 89  | C | 3.38661601  | -1.6882395  | 1.79109667  |
| 90  | C | 2.65293304  | -3.24085561 | 3.49319375  |
| 91  | C | 3.82074035  | -3.98379221 | 3.32266094  |
| 92  | C | 4.55534009  | -2.43215122 | 1.62904607  |
| 93  | H | 3.23527847  | -0.79964213 | 1.18097716  |
| 94  | H | 1.92354366  | -3.57261852 | 4.22909487  |
| 95  | H | 3.99121249  | -4.87792892 | 3.91653258  |
| 96  | H | 5.30542533  | -2.12051105 | 0.90698107  |
| 97  | H | 5.68386188  | -4.15405931 | 2.25402606  |
| 98  | H | -1.68729892 | 3.71362847  | -1.2365548  |
| 99  | H | -2.16359481 | 2.34185629  | -2.18958284 |
| 100 | C | -2.92003168 | 4.22023742  | -2.88462821 |
| 101 | C | -3.62242317 | 5.97470955  | -4.95304021 |
| 102 | C | -2.780783   | 5.60499314  | -2.71936303 |
| 103 | C | -3.42597982 | 3.72573275  | -4.09230491 |
| 104 | C | -3.77392388 | 4.59975222  | -5.12253254 |
| 105 | C | -3.12725837 | 6.47751459  | -3.75134693 |
| 106 | H | -2.39988838 | 6.01027048  | -1.78416674 |
| 107 | H | -3.55654636 | 2.65587601  | -4.23617969 |
| 108 | H | -4.1668848  | 4.206661    | -6.0561736  |
| 109 | H | -3.01223827 | 7.5496294   | -3.61754976 |
| 110 | H | -3.89411204 | 6.65414263  | -5.75622959 |
| 111 | H | -3.6767812  | 4.15553107  | 3.54868148  |
| 112 | C | -2.87013398 | 3.06983092  | 5.20439933  |
| 113 | C | -2.01215169 | 2.95088093  | 7.87188435  |
| 114 | C | -2.78558431 | 4.23634365  | 5.97796844  |
| 115 | C | -2.52843798 | 1.84410192  | 5.78832664  |
| 116 | C | -2.10051276 | 1.78524712  | 7.11487709  |
| 117 | C | -2.35681529 | 4.17557379  | 7.30468262  |
| 118 | H | -3.06058757 | 5.20357587  | 5.56089062  |
| 119 | H | -2.59551101 | 0.92092393  | 5.21905764  |
| 120 | H | -1.84535322 | 0.82704869  | 7.56167235  |
| 121 | H | -2.30131753 | 5.08327838  | 7.90130611  |
| 122 | H | -1.68694741 | 2.90310752  | 8.90841476  |
| 123 | H | -1.05052508 | -7.29811064 | -1.35545052 |
| 124 | C | 1.06282365  | -7.0446928  | -1.26877852 |
| 125 | C | 3.6187695   | -7.8637017  | -0.45846447 |

|     |   |             |             |             |
|-----|---|-------------|-------------|-------------|
| 126 | C | 1.25827622  | -7.61504441 | -0.00360068 |
| 127 | C | 2.16342872  | -6.89114357 | -2.12342585 |
| 128 | C | 3.4350509   | -7.29800829 | -1.71840032 |
| 129 | C | 2.53099198  | -8.02354133 | 0.39796235  |
| 130 | H | 0.42073535  | -7.74362588 | 0.6783636   |
| 131 | H | 2.04330774  | -6.44494997 | -3.10912339 |
| 132 | H | 4.28218017  | -7.170213   | -2.38757217 |
| 133 | H | 2.67490532  | -8.4657193  | 1.38015185  |
| 134 | H | 4.60996556  | -8.18000289 | -0.14489062 |
| 135 | H | 0.33888776  | -1.38739203 | -2.26652916 |
| 136 | C | -0.425181   | -0.77742511 | -4.15846043 |
| 137 | C | -2.38567808 | 0.38288016  | -5.78853595 |
| 138 | C | -0.06713756 | 0.12642539  | -5.16913476 |
| 139 | C | -1.77674069 | -1.08687335 | -3.96747218 |
| 140 | C | -2.75109835 | -0.51167731 | -4.78445029 |
| 141 | C | -1.04462098 | 0.70769186  | -5.97639736 |
| 142 | H | 0.97818489  | 0.38112189  | -5.33766946 |
| 143 | H | -2.07984912 | -1.7804031  | -3.18557641 |
| 144 | H | -3.79845935 | -0.76219693 | -4.63875541 |
| 145 | H | -0.75817199 | 1.40891234  | -6.75593327 |
| 146 | H | -3.14712029 | 0.82975618  | -6.42219536 |
| 147 | H | 6.72102429  | 1.55564148  | 0.18434041  |
| 148 | H | 5.30604907  | 0.941209    | 1.01129262  |
| 149 | C | 5.28924405  | 3.05653614  | 0.66005158  |
| 150 | C | 4.60108839  | 5.67289019  | 1.39496377  |
| 151 | C | 5.88947077  | 4.1528776   | 0.02750668  |
| 152 | C | 4.34520045  | 3.28695673  | 1.67095755  |
| 153 | C | 4.00126073  | 4.58965223  | 2.03303777  |
| 154 | C | 5.54694058  | 5.45439832  | 0.39549126  |
| 155 | H | 6.62307794  | 4.0017699   | -0.76114762 |
| 156 | H | 3.85894486  | 2.45379938  | 2.17487048  |
| 157 | H | 3.26147803  | 4.75732664  | 2.81014768  |
| 158 | H | 6.01174118  | 6.2989949   | -0.10600817 |
| 159 | H | 4.33065811  | 6.68779393  | 1.67248321  |
| 160 | H | 0.04912965  | 3.56021363  | -2.97378959 |
| 161 | H | 1.29203041  | 2.91850337  | -4.0087834  |
| 162 | C | 1.91939223  | 4.56082624  | -2.79872926 |
| 163 | C | 3.4091885   | 6.9078758   | -2.42485502 |
| 164 | C | 3.20936748  | 4.67717962  | -3.33285042 |
| 165 | C | 1.38390374  | 5.63857375  | -2.07890124 |
| 166 | C | 2.12624008  | 6.8049461   | -1.89155819 |
| 167 | C | 3.95018446  | 5.84496304  | -3.14553641 |
| 168 | H | 3.64390783  | 3.86165916  | -3.90774918 |
| 169 | H | 0.38068596  | 5.57381727  | -1.66273634 |
| 170 | H | 1.7006068   | 7.63466639  | -1.33427338 |
| 171 | H | 4.94856764  | 5.92522652  | -3.56676289 |



|     |   |             |             |             |
|-----|---|-------------|-------------|-------------|
| 172 | H | 3.98604282  | 7.81733406  | -2.28275886 |
| 173 | N | 1.1445674   | 2.64012845  | -0.57750514 |
| 174 | C | 0.73190812  | 1.84359647  | 0.37015616  |
| 175 | O | 0.63959453  | 2.40109183  | 1.49680333  |
| 176 | O | 0.4696475   | 0.64383587  | 0.1020135   |
| 177 | N | -2.04767574 | -4.81596247 | -1.39771322 |
| 178 | C | -2.56966332 | -3.7553371  | -0.82900103 |
| 179 | O | -1.78584004 | -2.92482504 | -0.29050001 |
| 180 | O | -3.82096413 | -3.70846811 | -0.82017494 |
| 181 | N | 0.14690921  | -1.72486493 | 0.66366755  |
| 182 | H | 0.92700721  | -2.24165358 | 0.23680955  |
| 183 | H | 0.2476039   | -0.71428411 | 0.39488838  |
| 184 | N | -0.8847358  | 3.33839109  | 3.14726189  |
| 185 | H | -0.84096949 | 4.34646889  | 2.97946383  |
| 186 | H | -0.57751293 | 3.07846728  | 4.0840035   |
| 187 | H | -2.69491402 | -5.54799326 | -1.65483567 |
| 188 | H | 1.45465701  | 3.57377751  | -0.34916837 |
| 189 | H | -0.16349184 | 2.94102988  | 2.48326351  |
| 190 | H | -0.68727405 | -2.07734435 | 0.13727042  |
